# Supplementary material
Source: PubMed Central journal article supplement (PMC6110950)
Supplement: NIHMS984967-supplement-SI.pdf [file NIHMS984967-supplement-SI.pdf]

## Online Methods

### Protein expression and purification

The catalytic domain of *Bacillus halodurans* RNase H1 (Bh-RNase HC, aa 59-196) was previously cloned into pET15b with an N-terminal His<sub>6</sub>-tag (pWY2042), and E188A mutant (pWY2063) was also made previously<sup>1</sup>. Bh-RNase HC-K196A (pWY2780) was constructed for this study by site-directed mutagenesis. The enzymes were expressed and purified as previously described<sup>1</sup>. For simplicity RNase HC is referred to as RNase H1 below.

### Preparation of RNA/DNA hybrid and co-crystallization with RNase H1

The RNA/DNA hybrid was made by annealing the oligo 5'-dArCrArUrCdG-3' and 3'-d(TGTAGC)-5' (IDT, IO USA) at 1.5 mM in TE buffer (10 mM Tris (pH 8.0) and 1 mM EDTA). The RNase H1 and RNA/DNA were mixed a molar ratio of 1:1.1 (300 μM RNase H1 and 330 μM RNA/DNA) and incubated for 30 min at 21°C. Crystals were grown by the hanging drop method at 21°C. Equal volumes of RNase H1-RNA/DNA complexes and the precipitant buffer (14% PEG3350, 20% glycerol, 200 mM KI, and 25 mM CaCl<sub>2</sub>) were equilibrated against the well buffer (12% PEG3350, 20% glycerol, 200 mM KI, and 25 mM CaCl<sub>2</sub>), and crystals of ~300 μm X 150 μm X 50 μm grew in 3-4 days.

### Pre-reaction Ca<sup>2+</sup> bound and EGTA/K<sup>+</sup> soaked structures

To obtain a Ca<sup>2+</sup>-bound structure, mature crystals were transferred to a buffer containing 23% PEG3350, 20% glycerol, 0.2 M KI, 50 mM HEPES (pH 7.0), and 2 mM CaCl<sub>2</sub> for 45-60 min at 21°C before flash freezing and storing in LN<sub>2</sub> for data collection. To obtain EGTA soaked K<sup>+</sup> structures, crystals were soaked in 50 μl of stabilization buffer

containing 23% PEG3350, 20% glycerol, 0.2 M KI, 50 mM HEPES (pH 7.0), and 0.5 mM EGTA and incubated at 21°C for 45-60 min before stabilization in a 50 µl stabilization buffer with 30% glycerol for flash freezing in LN<sub>2</sub>. To obtain the K<sup>+</sup> anomalous signal, data was collected at a home source X-ray generator (Rigaku RA-Micro7 HF mounted with a Rigaku Saturn A200 CCD detector, at  $\lambda=1.54 \text{ \AA}$ ).

### ***In crystallo* reaction and time courses in MgCl<sub>2</sub> or MnCl<sub>2</sub>**

Crystals of RNase H1-RNA/DNA complexes were transferred to 50 µl of stabilization buffer containing 23% PEG3350, 20% glycerol, 0.2 M KI, 50 mM HEPES pH 7.0, and 0.5 mM EGTA and incubated at 21°C for 45-60 min. Individual crystals were then transferred from the stabilization buffer to 50 µl of buffer containing 18% PEG3350, 0.2 M KI, 50 mM HEPES pH 7.0, and 2 mM MgCl<sub>2</sub> to allow *in crystallo* reactions to proceed for 40s, 80s, 120s...and 600s. At each desired end-point, a crystal was transferred to a cryo-protection buffer containing the reaction buffer and 30% glycerol for 10s before freezing in LN<sub>2</sub> to stop the reaction.

To initiate catalysis in the presence of rubidium ions, 0.2 M KI was substituted by 0.2 M RbCl in the stabilization, reaction and cryo-protection buffers and 5 mM MgCl<sub>2</sub> was used in the reaction and cryo-protection buffers. To initiate catalysis in the presence of lithium ions, 0.2 M KI was substituted by 0.2 M LiCl in the stabilization, reaction and cryo buffers and 2 mM or 5 mM MgCl<sub>2</sub> was used in the reaction and cryo-protection buffers.

For the E188A mutant, reactions were conducted in similar buffers as the WT enzyme. For K196A, reactions were performed in the presence of 0.2 M RbCl and 5-10 mM MgCl<sub>2</sub>. For time-courses conducted in MnCl<sub>2</sub>, crystals of RNase H1-RNA/DNA

containing WT, E188A or K196A enzyme were treated similarly using the same protocol described for MgCl<sub>2</sub>, but MgCl<sub>2</sub> was substituted for 4 mM MnCl<sub>2</sub>.

### ***In crystallo* titrations of K<sup>+</sup>**

No more than 5 crystals of RNase H1-RNA/DNA complexes were transferred to 50 µl of stabilization buffer containing 23% PEG3350, 20% glycerol, 5 mM KI, 50 mM HEPES pH 7.0, and 0.5 mM EGTA, and incubated at 21°C for 45-60 min. A single crystal was then transferred to a fresh 50 µl drop of stabilization buffer for 5 min to further dilute any residual crystallization buffer. To initiate the reaction, the washed crystal was transferred to a reaction buffer containing 5, 25, 50, 100 to 300 mM KI for 120 s, and then dipped in cryo-protection buffer containing reaction buffer and 30% glycerol before freezing in LN<sub>2</sub> for data collection later.

### ***In crystallo* titration of Mn<sup>2+</sup> and Mg<sup>2+</sup>**

Concentration titrations in Mn<sup>2+</sup> and 200 mM K<sup>+</sup> were done by following the *in crystallo* protocol and varying the concentration of Mn<sup>2+</sup> in the reaction and cryo-protection buffers (from 2-100 mM). Crystals were soaked for 40 s in the reaction buffer before freezing and storing in LN<sub>2</sub> for data collection later. Concentration titrations in Mg<sup>2+</sup> and 75 mM K<sup>+</sup> were done by following the *in crystallo* protocol and varying the concentration of Mg<sup>2+</sup> in the reaction and cryo-protection buffers (from 1-80 mM). Crystals were soaked for 40 s in the reaction buffer before freezing and storing in LN<sub>2</sub> for data collection later.

X-ray data were collected at the 22-BM or 22-ID beam lines at the Advanced Photon Source (APS, Argonne, Illinois). Data for the RNase H1 soak in EGTA at 200mM

K<sup>+</sup> (Fig S1b, right panel and Supplementary Data Set 2) was collected at 1.54 Å using the home X-ray source (Rigaku MicroMax-007HF with Saturn A200 CCD detector, Rigaku). For native and Mn<sup>2+</sup> anomalous datasets, 150° of data were collected at the wavelength of 1.0 Å. For Rb<sup>+</sup> anomalous datasets, 450° of data were collected at the wavelength of 0.8 Å. Diffraction data were indexed, processed and scaled using HKL2000<sup>2</sup>. All crystals are in the C2<sub>1</sub> space group (Table 1, 2, Supplementary Data Set 2). The initial structure of RNase H1-RNA/DNA was solved by molecular replacement using MolRep (CCP4)<sup>3</sup> and the D192N mutant RNase H1 structure (PDB 1ZBL) as a search model, and the RNA/DNA molecule was built using COOT<sup>4</sup>. All structures were refined using PHENIX<sup>5</sup>. Geometric constraints were used to fix the atoms in the electron density. Occupancy was refined by fixing the occupancy and refining B factors until ligand and metal B factors were similar and the electron density in the Fo-Fc map was minimized<sup>6</sup>. Models and maps were viewed in COOT, and figures were generated using PyMol ([www.pymol.com](http://www.pymol.com)). ShelxC was used for preparing anomalous data and Anode was used for calculating the anomalous signal, which was converted into a map format using Shelx2map (CCP4). The anomalous maps were visualized in COOT.

### **Calculation of unbiased IFol-IFcl omit maps**

Omit models were made by removing the scissile phosphate, the A and B metal ions, and if needed, the monovalent cations, water molecules, and active site residues from an appropriate ground state model<sup>6</sup>. Unit cell parameters in each sca file of a time course series were set to the same averaged values. The sca files were then truncated and converted to mtz format in AIMLESS (CCP4), combined in CAD (CCP4) and scaled

together to the appropriate ground state model in SCALEIT (CCP4).  $|F_o| - |F_c|$  omit maps were calculated in SFALL (CCP4) for each dataset in a series using the  $F_o$  (SCALEIT output) and  $F_c$  of the omit reference model. FFT (CCP4) was then used to convert the SFALL outputs to map files that were visualized and analyzed in COOT. The python script “density\_at\_point” in COOT was used for measuring the peak heights of the 5'-phosphate product and metal ions<sup>6</sup>. The values were normalized using the RMSD of each  $|F_o| - |F_c|$  map calculated in FFT.

### **Substrate preparation for in solution assays**

The 5'-fluorescein (Fluor) labeled oligo 5' Fluor-dT /AGT CAC CGT ArCrA rUrc G- 3' (Integrated DNA Technologies, USA) was suspended in 10 mM TE at 100  $\mu$ M concentration and purified by gel extraction methods. The RNA/DNA hybrid was annealed after mixing the above purified oligo with 3'- CGATGT ACG GTG ACT A – 5' (Integrated DNA Technologies, USA) at a final concentration of 1-5  $\mu$ M in TE, and annealed by heating to 75°C in a thermocycler and slowly cooled (1°C/min) to 4°C.

### **Activity assays of WT, E188A and K196A RNase H1 in solution**

For each reaction, WT, E188A, or K196A RNase H1 was incubated with 100 nM of Fluor-labeled RNA/DNA substrate in 12.5  $\mu$ l of 50 mM HEPES (pH 7.3), 1 mM DTT, 20  $\mu$ g/ml BSA, 75 mM KCl, 2% glycerol for 10 min at 22°C. Reactions were initiated by adding 12.5  $\mu$ l of  $MgCl_2$  or  $MnCl_2$  to a final concentration of 4 mM and incubated at 37°C for 30 min. The  $Mg^{2+}$ -dependent reactions were carried out with 12, 24, 48 and 96 nM of each enzyme, and the  $Mn^{2+}$ -dependent reactions were carried out with 0.03, 0.06, 0.12, 0.24, and 0.48 nM of each enzyme. The reactions were stopped by adding 25  $\mu$ l 2X TBE buffer

(ThermoFisher) containing 100 mM EDTA and heated for 5 min at 95°C followed by incubation at 4°C for 2 min. Samples were run on 20% TBE urea gels and imaged with a Typhoon FLA 9500 biomolecular imager (GE Healthcare Life Sciences) using the emission filter: 520 BP 40 and laser: blue (488 nm) and RNA product was quantified with ImageJ.

### **Monovalent ion dependent RNase H1 activities**

Activity assays were conducted as described above. 200 nM substrate and 100 nM WT RNase H1 were incubated in the buffer containing 200 mM KCl, LiCl, RbCl or NaCl in 50 mM HEPES (pH 7.0), 1 mM DTT, and 20 µg/ml BSA first. The reactions were initiated by the addition of 2 mM Mg<sup>2+</sup> (final) and incubated at 22°C for 45 min.

### **Mn<sup>2+</sup> titration in solution**

The 5'-fluorescein (Fluor) labeled hybrid (500 nM) and 1 nM WT RNase HC was mixed and incubated in a crystallization-like buffer containing 50 mM HEPES (pH 7.0), 2.5% PEG3350, and 200 mM KCl for 10 min. The reactions were initiated by adding an equal volume of MnCl<sub>2</sub> to the final concentrations of 0.5, 1, 2, 4, 8, 16, 20, and 40 mM, and stopped after 5 min of incubation at 22°C.

### **Data availability**

The coordinates and structure factors have been deposited in the Protein Data Bank under the accession codes: 6DMN, 6DMV, 6DO8, 6DO9, 6DOA, 6DOB, 6DOC, 6DOD, 6DOE, 6DOF, 6DOG, 6DOH, 6DOI, 6DOJ, 6DOK, 6DOL, 6DOM, 6DON, 6DOO, 6DOP, 6DOQ, 6DOR, 6DOS, 6DOT, 6DOU, 6DOV, 6DOW, 6DPP, 6DOX, 6DOY, 6DOZ, 6DP0, 6DP1, 6DP2, 6DP3, 6DP4, 6DP5, 6DP6, 6DP7, 6DP8, 6DP9, 6DPA,

6DPB, 6DPC, 6DPD, 6DPE, 6DPF, 6DPG, 6DPH, 6DPI, 6DPJ, 6DPK, 6DPL, 6DPM, 6DPN, 6DPO. Source data for Fig. 4a is available with the paper online. Other data and results are available from the corresponding author upon reasonable request.

## References

29. Nowotny, M., Gaidamakov, S.A., Crouch, R.J. & Yang, W. Crystal structures of RNase H bound to an RNA/DNA hybrid: substrate specificity and metal-dependent catalysis. *Cell* **121**, 1005-16 (2005).
30. Otwinowski, Z. & Minor, W. Processing of X-ray diffraction data collected in oscillation mode. *Methods Enzymol.* **276**, 307-326 (1997).
31. Winn, M.D. et al. Overview of the CCP4 suite and current developments. *Acta Crystallogr D Biol Crystallogr* **67**, 235-42 (2011).
32. Emsley, P., Lohkamp, B., Scott, W.G. & Cowtan, K. Features and development of Coot. *Acta Crystallogr D Biol Crystallogr* **66**, 486-501 (2010).
33. Adams, P.D. et al. PHENIX: a comprehensive Python-based system for macromolecular structure solution. *Acta Crystallogr D Biol Crystallogr* **66**, 213-21 (2010).
34. Samara, N.L., Gao, Y., Wu, J. & Yang, W. Detection of Reaction Intermediates in Mg<sup>2+</sup>-Dependent DNA Synthesis and RNA Degradation by Time-Resolved X-Ray Crystallography. *Methods Enzymol* **592**, 283-327 (2017).



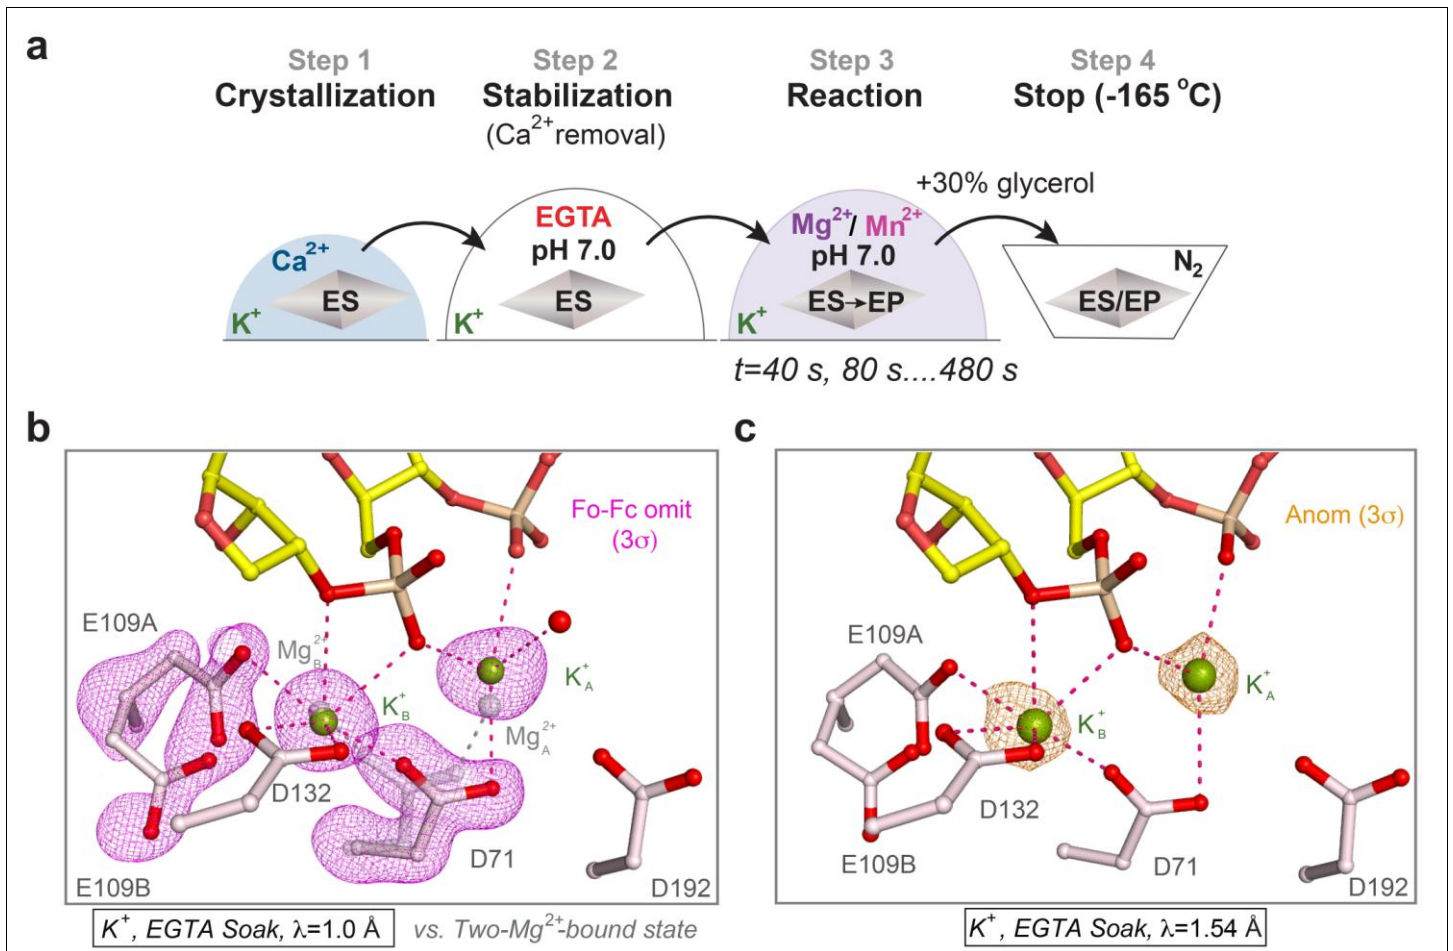

### Supplementary Figure 1

#### RNA hydrolysis in crystallo.

**a**, A diagram of co-crystallization of RNase H1 and RNA:DNA hybrid, procedure of in crystallo reaction and preparation for X-ray diffraction data acquisition. **b,c**, Structures of EGTA-soaked RNase H1-substrate co-crystals with data collected at  $\lambda = 1.0$  Å and  $\lambda = 1.54$  Å. Altered conformations of D71 and E109 in the absence of two canonical Me<sup>2+</sup> ions are shown with the pink omit map (contoured at 3 $\sigma$ ), and the reference structure in the presence of Mg<sup>2+</sup> ions is shown as semitransparent gray sticks (D71) and spheres (Mg<sup>2+</sup>). **c**, The presence of K<sup>+</sup> after EGTA soaking is confirmed by the anomalous signal (contoured at 3 $\sigma$ ) at  $\lambda = 1.54$  Å.

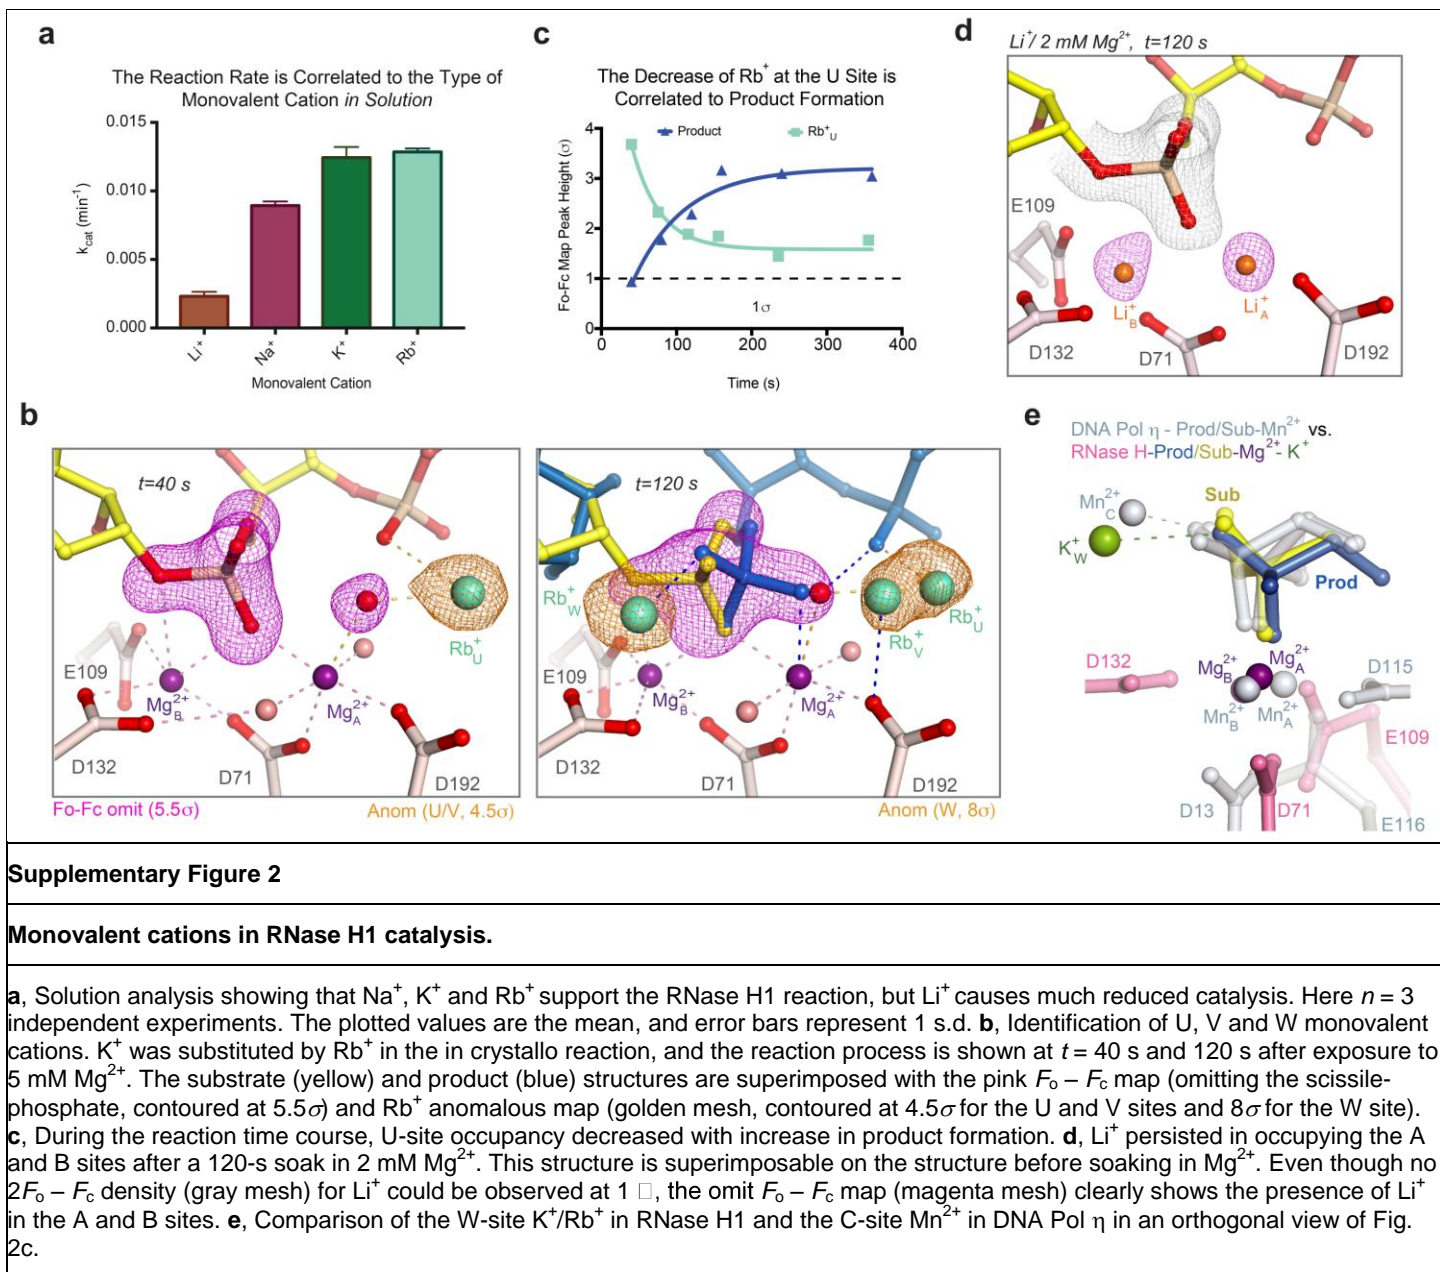

## Supplementary Figure 2

### Monovalent cations in RNase H1 catalysis.

**a**, Solution analysis showing that  $\text{Na}^+$ ,  $\text{K}^+$  and  $\text{Rb}^+$  support the RNase H1 reaction, but  $\text{Li}^+$  causes much reduced catalysis. Here  $n = 3$  independent experiments. The plotted values are the mean, and error bars represent 1 s.d. **b**, Identification of U, V and W monovalent cations.  $\text{K}^+$  was substituted by  $\text{Rb}^+$  in the in crystallo reaction, and the reaction process is shown at  $t = 40$  s and 120 s after exposure to 5 mM  $\text{Mg}^{2+}$ . The substrate (yellow) and product (blue) structures are superimposed with the pink  $F_o - F_c$  map (omitting the scissile-phosphate, contoured at  $5.5\sigma$ ) and  $\text{Rb}^+$  anomalous map (golden mesh, contoured at  $4.5\sigma$  for the U and V sites and  $8\sigma$  for the W site). **c**, During the reaction time course, U-site occupancy decreased with increase in product formation. **d**,  $\text{Li}^+$  persisted in occupying the A and B sites after a 120-s soak in 2 mM  $\text{Mg}^{2+}$ . This structure is superimposable on the structure before soaking in  $\text{Mg}^{2+}$ . Even though no  $2F_o - F_c$  density (gray mesh) for  $\text{Li}^+$  could be observed at  $1\sigma$ , the omit  $F_o - F_c$  map (magenta mesh) clearly shows the presence of  $\text{Li}^+$  in the A and B sites. **e**, Comparison of the W-site  $\text{K}^+/\text{Rb}^+$  in RNase H1 and the C-site  $\text{Mn}^{2+}$  in DNA Pol  $\eta$  in an orthogonal view of Fig. 2c.

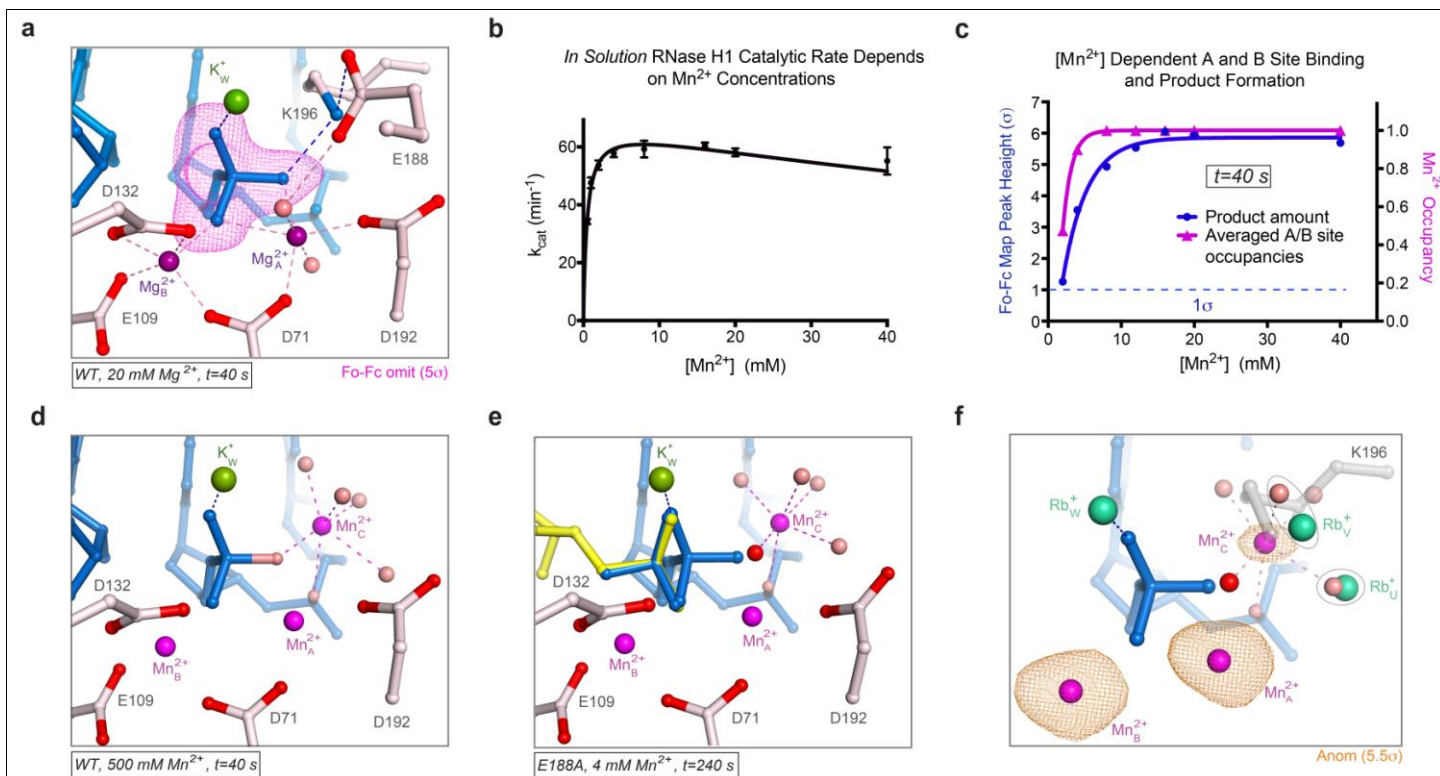

### Supplementary Figure 3

#### Evidence for a third $Me^{2+}$ in wild-type RNase H1 catalysis.

**a**, The *in crystallo* reaction catalyzed by WT RNase H1 was 80% complete with 20 mM  $Mg^{2+}$  at  $t = 40$  s. E188 and K196 interact with each other. E188 also interacts with the A-site  $Mg^{2+}$  ion via a water molecule, and K196 interacts with the 5'-phosphate product. **b**, Dependence of RNase H1 catalytic rates on  $Mn^{2+}$  concentrations in solution. Initially increased concentration of  $Me^{2+}$  increases the reaction rate, probably owing to the low affinity of C-site  $Me^{2+}$ , but high concentrations of  $Me^{2+}$  eventually lead to prolonged binding of  $Me^{2+}_C$  and prevent product release. Here  $n = 3$  independent experiments. The plotted values are the mean, and error bars represent 1 s.d. **c**, In the *in crystallo* reaction, the A and B occupancies (magenta) and product formation (blue) required different  $Mn^{2+}$  concentrations. **d**, The *in crystallo* reaction catalyzed by WT RNase H1 was 100% complete with 500 mM  $Mn^{2+}$  at  $t = 40$  s. K196 is disordered in this state, and  $Mn^{2+}_C$  (magenta) occupies that space and similarly interacts with the 5'-phosphate product, as well as the downstream phosphate and four water ligands. **e**,  $Mn^{2+}_C$  (magenta) also appears in the *in crystallo* reaction catalyzed by RNaseH1<sup>E188A</sup> at  $t = 240$  s, where K196 is similarly disordered despite the presence of product. **f**, One of the water ligands of  $Mn^{2+}_C$  overlaps with  $K^+_U$ , and another water ligand of  $Mn^{2+}_C$  overlaps with  $K^+_V$ , both enclosed in an oval. If present, K196 (shown as semitransparent sticks) overlaps with  $Mn^{2+}_C$ .

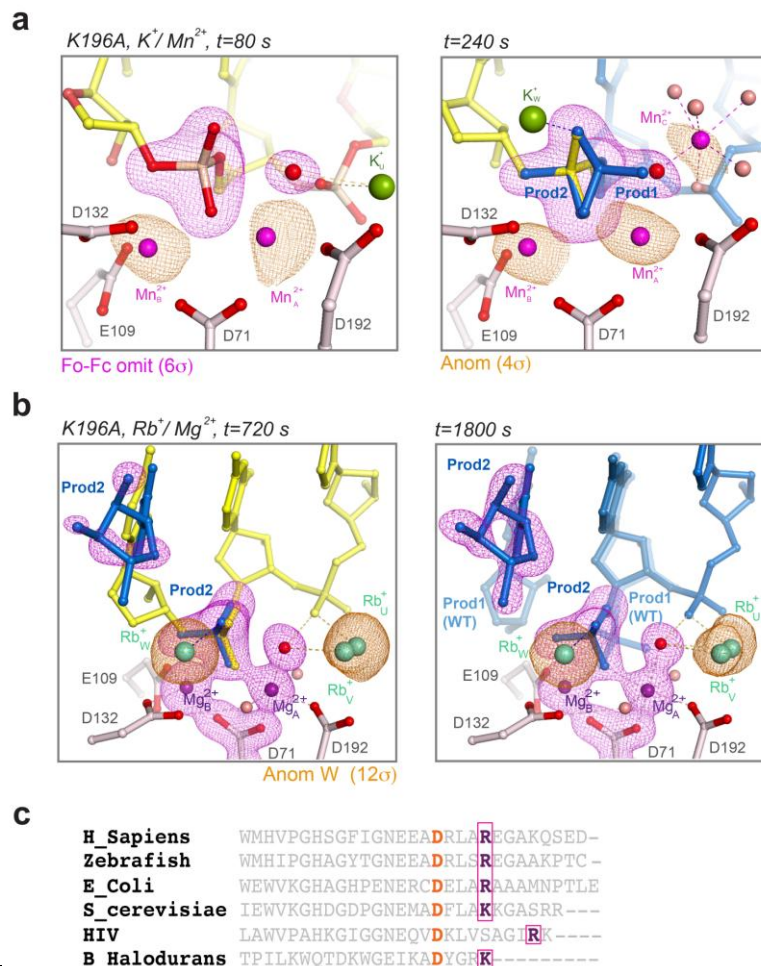

#### Supplementary Figure 4

#### Defects of K196A mutant RNase H1.

**a**, In crystallo reactions with 4 mM Mn<sup>2+</sup> rescued the slow reaction and most product inversion with the K196A mutation. The C-site Mn<sup>2+</sup> is superimposable with that in the reaction catalyzed by RNaseH1<sup>E188A</sup> (Fig. 4b). The golden anomalous map (contoured at 3.5σ) and the pink F<sub>o</sub> – F<sub>c</sub> omit map (contoured at 6σ) are also shown. **b**, In the in crystallo catalysis by RNaseH1<sup>K196A</sup>, the 5'-phosphate product (blue) was inverted and adopted the same conformation as the substrate (yellow) by t = 720 s and most clearly at t = 1,800 s. The pink omit F<sub>o</sub> – F<sub>c</sub> map (5σ) is superimposed onto the structural model. The three monovalent cations were confirmed by Rb<sup>+</sup> anomalous signals (golden mesh, contoured at 12σ for Rb<sup>+</sup><sub>w</sub> and 3.5σ for Rb<sup>+</sup><sub>u</sub> and Rb<sup>+</sup><sub>v</sub>) as with WT RNase H1. **c**, Presence of a positively charged residue (K196 equivalent) adjacent to the C-terminal catalytic carboxylate is conserved in RNase H1 homologs.

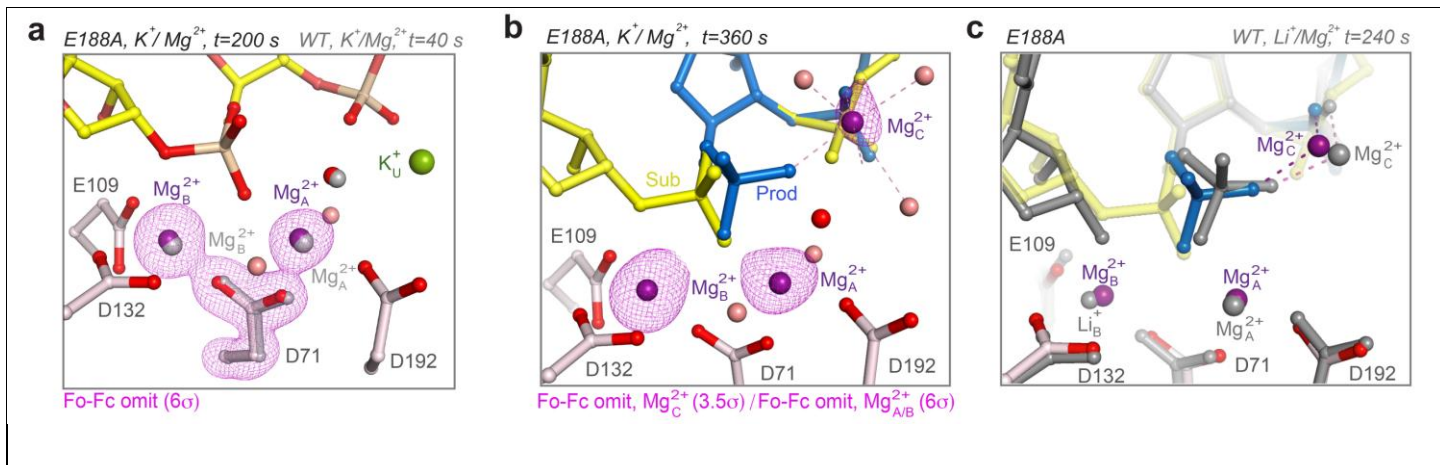

### Supplementary Figure 5

#### Defects of E188A mutant RNase H1.

**a**, In crystallo catalysis by E188A RNase H1 reveals delayed binding of the A-site  $Mg^{2+}$ , which took 200 s to displace  $K^+$  ions instead of 40 s as in WT RNase H1 (shown in gray). **b**, By  $t = 360$  s, the C-site  $Mg^{2+}$  along with its coordination ligands and the shifted 5'-phosphate product were observed as WT enzyme in the presence of  $Li^+/Mg^{2+}$ . Structures in **a** and **b** are superimposed with pink  $F_o - F_c$  omit maps contoured at  $6\sigma$  for 200 s and  $3.5\sigma$  for 360 s. **c**, Comparison of the third  $Mg^{2+}$  in the reactions catalyzed by WT ( $Li^+$ ) (shown in gray) and E188A mutant RNase H1. For the WT structure,  $Li^+$  was modeled in the B site because it had much lower  $2F_o - F_c$  signal than the A site while the five coordination ligands were the same as when the B site was fully occupied.

**Table S1 Data collection and refinement statistics**(3) RNase H1<sup>WT</sup> reaction with 2 mM Mg<sup>2+</sup> and 200 mM K<sup>+</sup> (Fig. 2a)

|                                                                   | 200 s<br>PDB 6DOB         | 240 s<br>PDB 6DOC         | 360 s<br>PDB 6DOD         |
|-------------------------------------------------------------------|---------------------------|---------------------------|---------------------------|
| <b>Data collection</b>                                            |                           |                           |                           |
| Space group                                                       | C 1 2 1                   | C 1 2 1                   | C 1 2 1                   |
| Cell dimensions                                                   |                           |                           |                           |
| <i>a, b, c</i> (Å)                                                | 81.4, 38.1, 62.1          | 81.4, 37.9, 61.9          | 81.6, 38.0, 62.4          |
| <i>a, b, γ</i> (°)                                                | 90, 96.2, 90              | 90, 96.3, 90              | 90, 96.3, 90              |
| Resolution (Å) <sup>1</sup>                                       | 50.0 - 1.34 (1.37 - 1.34) | 50.0 - 1.50 (1.53 - 1.50) | 50.0 - 1.54 (1.57 - 1.54) |
| <i>R</i> <sub>pim</sub> <sup>1</sup>                              | 0.038 (0.856)             | 0.042 (0.683)             | NA                        |
| <i>R</i> <sub>sym</sub> or <i>R</i> <sub>merge</sub> <sup>1</sup> | 0.051 (>1.0)              | 0.061 (0.871)             | 0.079 (0.822)             |
| <i>I</i> / <i>σ</i> ( <i>I</i> ) <sup>1</sup>                     | 15.6 (0.84)               | 14.5 (1.52)               | 10.0 (1.27)               |
| CC <sub>1/2</sub> <sup>1</sup>                                    | (0.161)                   | (0.568)                   | NA                        |
| Completeness (%) <sup>1</sup>                                     | 97.1 (91.2)               | 95.1 (95.2)               | 99.0 (93.6)               |
| Redundancy <sup>1</sup>                                           | 2.7 (2.0)                 | 2.9 (2.7)                 | 3.0 (2.6)                 |
| <b>Refinement</b>                                                 |                           |                           |                           |
| Resolution (Å) <sup>1</sup>                                       | 23.4 - 1.34               | 23.5 - 1.50               | 31.0 - 1.54               |
| No. reflections <sup>1</sup>                                      | 40941                     | 28741                     | 28053                     |
| <i>R</i> <sub>work</sub> / <i>R</i> <sub>free</sub>               | 16.9 / 19.6               | 18.8 / 22.1               | 16.0 / 19.5               |
| No. atoms                                                         |                           |                           |                           |
| Protein / RNA/ DNA                                                | 2096 / 135 / 121          | 2096 / 135 / 121          | 2096 / 135 / 121          |
| Me <sup>2+</sup>                                                  | 2 Mg <sup>2+</sup>        | 2 Mg <sup>2+</sup>        | 2 Mg <sup>2+</sup>        |
| Me <sup>+4</sup>                                                  | 3 K <sup>+</sup>          | 3 K <sup>+</sup>          | 3 K <sup>+</sup>          |
| Halides <sup>4</sup>                                              | 4 I <sup>-</sup>          | 4 I <sup>-</sup>          | 4 I <sup>-</sup>          |
| Water/ Solvent                                                    | 196 / 56                  | 193 / 56                  | 196 / 56                  |
| Occupancy                                                         |                           |                           |                           |
| RS: PS                                                            | 0.45 : 0.55               | 0.35 : 0.65               | 0.35 : 0.65               |
| A site                                                            | 1.0 Mg <sup>2+</sup>      | 1.0 Mg <sup>2+</sup>      | 1.0 Mg <sup>2+</sup>      |
| B site                                                            | 1.0 Mg <sup>2+</sup>      | 1.0 Mg <sup>2+</sup>      | 1.0 Mg <sup>2+</sup>      |
| U site                                                            | 0.10 K <sup>+</sup>       | 0.10 K <sup>+</sup>       | 0.10 K <sup>+</sup>       |
| W site                                                            | 0.30 K <sup>+</sup>       | 0.35 K <sup>+</sup>       | 0.35 K <sup>+</sup>       |
| B-factors                                                         |                           |                           |                           |
| Macromolecules                                                    | 23.2                      | 25.2                      | 25.8                      |
| Me <sub>A</sub> / Lig <sub>A</sub> <sup>2</sup>                   | 18.5 / 21.6               | 21.0 / 24.6               | 18.8 / 20.5               |
| Me <sub>B</sub> / Lig <sub>B</sub> <sup>2</sup>                   | 18.3 / 20.0               | 18.7 / 17.5               | 17.3 / 19.5               |
| Me <sub>U</sub> / Lig <sub>U</sub> <sup>2</sup>                   | 27.2 / 25.5               | 29.9 / 28.5               | 27.8 / 24.7               |
| Me <sub>W</sub> / Lig <sub>W</sub> <sup>2</sup>                   | 22.4 / 18.1               | 22.3 / 22.8               | 17.8 / 19.6               |
| Solvent <sup>3</sup>                                              | 39.0                      | 39.1                      | 40.2                      |
| R.m.s deviations                                                  |                           |                           |                           |
| Bond lengths (Å)                                                  | 0.009                     | 0.010                     | 0.009                     |
| Bond angles (°)                                                   | 1.12                      | 1.19                      | 1.15                      |

<sup>1</sup> Data in the highest resolution shell is shown in the parenthesis.<sup>2</sup> B-factors of metal ions and their protein, solvent, and nucleotide ligands.<sup>3</sup> Water, ethylene glycol and glycerol<sup>4</sup> B factors and occupancies are not listed for non-catalytic monovalent cations and halides

(4) RNase H1<sup>WT</sup> reaction with 2 mM Mg<sup>2+</sup> and 200 mM K<sup>+</sup> (Fig. 2a)-Cont'd

|                                                                   | 420 s<br>PDB 6DOE         | 540 s<br>PDB 6DOF          | 600 s<br>PDB 6DOG         |
|-------------------------------------------------------------------|---------------------------|----------------------------|---------------------------|
| <b>Data collection</b>                                            |                           |                            |                           |
| Space group                                                       | C 1 2 1                   | C 1 2 1                    | C 1 2 1                   |
| Cell dimensions                                                   |                           |                            |                           |
| <i>a</i> , <i>b</i> , <i>c</i> (Å)                                | 81.6, 38.0, 62.4          | 81.8, 37.9, 62.5           | 81.6, 37.9, 62.2          |
| <i>a</i> , <i>b</i> , $\gamma$ (°)                                | 90, 96.3, 90              | 90, 96.2, 90               | 90, 96.2, 90              |
| Resolution (Å) <sup>1</sup>                                       | 50.0 - 1.45 (1.48 - 1.45) | 50.0 - 1.43 (1.486 - 1.43) | 50.0 - 1.28 (1.31 - 1.28) |
| <i>R</i> <sub>pim</sub> <sup>1</sup>                              | NA                        | NA                         | 0.035 (0.518)             |
| <i>R</i> <sub>sym</sub> or <i>R</i> <sub>merge</sub> <sup>1</sup> | 0.072 (0.568)             | 0.074 (0.613)              | 0.051 (0.691)             |
| <i>I</i> / $\sigma$ <i>I</i> <sup>1</sup>                         | 12.1 (1.24)               | 10.6 (1.57)                | 14.0 (1.17)               |
| CC <sub>1/2</sub> <sup>1</sup>                                    | NA                        | NA                         | (0.572)                   |
| Completeness (%) <sup>1</sup>                                     | 98.0 (91.1)               | 99.0 (99.5)                | 98.9 (96.2)               |
| Redundancy <sup>1</sup>                                           | 2.9 (2.3)                 | 3.0 (2.6)                  | 2.7 (2.2)                 |
| <b>Refinement</b>                                                 |                           |                            |                           |
| Resolution (Å) <sup>1</sup>                                       | 31.0 - 1.45               | 31.1 - 1.43                | 20.3 - 1.28               |
| No. reflections <sup>1</sup>                                      | 33083                     | 34641                      | 47259                     |
| <i>R</i> <sub>work</sub> / <i>R</i> <sub>free</sub>               | 17.0 / 19.8               | 16.1 / 18.7                | 16.1 / 18.3               |
| No. atoms                                                         |                           |                            |                           |
| Protein / RNA/ DNA                                                | 2096 / 135 / 121          | 2096 / 135 / 121           | 2096 / 135 / 121          |
| Mg <sup>2+</sup>                                                  | 2 Mg <sup>2+</sup>        | 2 Mg <sup>2+</sup>         | 2 Mg <sup>2+</sup>        |
| K <sup>+</sup>                                                    | 3 K <sup>+</sup>          | 3 K <sup>+</sup>           | 3 K <sup>+</sup>          |
| Halides <sup>4</sup>                                              | 4 I <sup>-</sup>          | 4 I <sup>-</sup>           | 4 I <sup>-</sup>          |
| Water/ Solvent                                                    | 196 / 56                  | 196 / 56                   | 196 / 56                  |
| Occupancy                                                         |                           |                            |                           |
| RS: PS                                                            | 0.45 : 0.55               | 0.45 : 0.55                | 0.35 : 0.65               |
| A site                                                            | 1.0 Mg <sup>2+</sup>      | 1.0 Mg <sup>2+</sup>       | 1.0 Mg <sup>2+</sup>      |
| B site                                                            | 1.0 Mg <sup>2+</sup>      | 1.0 Mg <sup>2+</sup>       | 1.0 Mg <sup>2+</sup>      |
| U site                                                            | 0.10 K <sup>+</sup>       | 0.10 K <sup>+</sup>        | 0.10 K <sup>+</sup>       |
| W site                                                            | 0.30 K <sup>+</sup>       | 0.30 K <sup>+</sup>        | 0.35 K <sup>+</sup>       |
| B-factors                                                         |                           |                            |                           |
| Macromolecules                                                    | 22.6                      | 23.6                       | 22.8                      |
| Me <sub>A</sub> / Lig <sub>A</sub> <sup>2</sup>                   | 18.8 / 21.7               | 20.2 / 25.2                | 18.2 / 22.2               |
| Me <sub>B</sub> / Lig <sub>B</sub> <sup>2</sup>                   | 17.7 / 19.6               | 16.9 / 21.1                | 17.1 / 18.8               |
| Me <sub>U</sub> / Lig <sub>U</sub> <sup>2</sup>                   | 31.3 / 26.6               | 27.7 / 29.9                | 21.2 / 26.3               |
| Me <sub>W</sub> / Lig <sub>W</sub> <sup>2</sup>                   | 19.4 / 19.1               | 19.1 / 21.9                | 22.8 / 21.1               |
| Solvent <sup>3</sup>                                              | 37.5                      | 38.4                       | 38.5                      |
| R.m.s deviations                                                  |                           |                            |                           |
| Bond lengths (Å)                                                  | 0.009                     | 0.008                      | 0.008                     |
| Bond angles (°)                                                   | 1.15                      | 1.13                       | 1.10                      |

<sup>1</sup> Data in the highest resolution shell is shown in the parenthesis.<sup>2</sup> B-factors of metal ions and their protein, solvent, and nucleotide ligands.<sup>3</sup> Water, ethylene glycol and glycerol<sup>4</sup> B factors and occupancies are not listed for non-catalytic monovalent cations and halides

(5) RNase H1<sup>WT</sup> Substrate Complexes - EGTA Soaks (Fig.S1b)

|                                                                   | EGTA Soak/200 mM K <sup>+</sup><br>PDB 6DOH | EGTA Soak/200 mM K <sup>+</sup> <sup>5</sup><br>PDB 6DOI |
|-------------------------------------------------------------------|---------------------------------------------|----------------------------------------------------------|
| <b>Data collection</b>                                            |                                             |                                                          |
| Space group                                                       | C 1 2 1                                     | C 1 2 1                                                  |
| Cell dimensions                                                   |                                             |                                                          |
| <i>a</i> , <i>b</i> , <i>c</i> (Å)                                | 81.2, 37.8, 61.8                            | 81.4, 38.0, 62.1                                         |
| <i>a</i> , <i>b</i> , $\gamma$ (°)                                | 90, 96.1, 90                                | 90, 96.2, 90                                             |
| Resolution (Å) <sup>1</sup>                                       | 19.1 - 1.40 (1.45 - 1.40)                   | 22.0 - 1.95 (2.02 - 1.95)                                |
| <i>R</i> <sub>pim</sub> <sup>1</sup>                              | 0.065 (0.707)                               | NA                                                       |
| <i>R</i> <sub>sym</sub> or <i>R</i> <sub>merge</sub> <sup>1</sup> | 0.096 (0.947)                               | 0.070 (0.215)                                            |
| <i>I</i> / $\sigma$ ( <i>I</i> ) <sup>1</sup>                     | 8.7 (0.78)                                  | 14.1 (3.6)                                               |
| CC <sub>1/2</sub> <sup>1</sup>                                    | NA                                          | NA                                                       |
| Completeness (%) <sup>1</sup>                                     | 97.4 (83.2)                                 | 92.3 (78.1)                                              |
| Redundancy <sup>1</sup>                                           | 2.8 (2.2)                                   | 3.1 (2.3)                                                |
| <b>Refinement</b>                                                 |                                             |                                                          |
| Resolution (Å) <sup>1</sup>                                       | 19.1 - 1.40                                 | 22.0 - 1.95                                              |
| No. reflections <sup>1</sup>                                      | 35608                                       | 12946                                                    |
| <i>R</i> <sub>work</sub> / <i>R</i> <sub>free</sub>               | 16.8 / 20.0                                 | 14.7 / 19.5                                              |
| No. atoms                                                         |                                             |                                                          |
| Protein / RNA / DNA                                               | 2034 / 122 / 121                            | 2016 / 122 / 121                                         |
| Me <sup>2+</sup>                                                  | 1 Ca <sup>2+</sup>                          | 1 Ca <sup>2+</sup>                                       |
| Me <sup>+4</sup>                                                  | 3 K <sup>+</sup>                            | 2 K <sup>+</sup>                                         |
| Halides <sup>4</sup>                                              | 4 I <sup>-</sup>                            | 4 I <sup>-</sup>                                         |
| Water/ Solvent                                                    | 175/ 36                                     | 166 / 36                                                 |
| Occupancy                                                         |                                             |                                                          |
| RS: PS                                                            | 1.0 : 0                                     | 1.0 : 0                                                  |
| A site                                                            | 0.30 Ca <sup>2+</sup>                       | 0.30 Ca <sup>2+</sup>                                    |
| B site                                                            | NA                                          | NA                                                       |
| A' site                                                           | 0.70 K <sup>+</sup>                         | 0.70 K <sup>+</sup>                                      |
| B' site                                                           | 0.70 K <sup>+</sup>                         | 0.70 K <sup>+</sup>                                      |
| B-factors                                                         |                                             |                                                          |
| Macromolecules                                                    | 27.3                                        | 30.6                                                     |
| Me <sub>I</sub> / Lig <sub>A</sub> <sup>2</sup>                   | 27.2 / 27.2                                 | 22.3 / 25.0                                              |
| Me <sub>II</sub> / Lig <sub>B</sub> <sup>2</sup>                  | 23.2 / 22.0                                 | 24.5 / 22.8                                              |
| Solvent <sup>3</sup>                                              | 41.9                                        | 39.2                                                     |
| R.m.s deviations                                                  |                                             |                                                          |
| Bond lengths (Å)                                                  | 0.008                                       | 0.009                                                    |
| Bond angles (°)                                                   | 1.01                                        | 1.02                                                     |

<sup>1</sup> Data in the highest resolution shell is shown in the parenthesis.<sup>2</sup> B-factors of metal ions and their protein, solvent, and nucleotide ligands.<sup>3</sup> Water, ethylene glycol and glycerol<sup>4</sup> B factors and occupancies are not listed for non-catalytic monovalent cations and halides<sup>5</sup> Collected at  $\lambda = 1.54$  Å



(6) RNase H1<sup>WT</sup> 120 s reaction with 2 mM Mg<sup>2+</sup> and 5-300 mM K<sup>+</sup> (Fig. 2b)

|                                                                   | 5 mM<br>PDB 6DOJ          | 25 mM (1)<br>PDB 6DOK     | 25 mM (2)<br>PDB 6DOL     | 50 mM<br>PDB 6DOM         |
|-------------------------------------------------------------------|---------------------------|---------------------------|---------------------------|---------------------------|
| <b>Data collection</b>                                            |                           |                           |                           |                           |
| Space group                                                       | C 1 2 1                   | C 1 2 1                   | C 1 2 1                   | C 1 2 1                   |
| Cell dimensions                                                   |                           |                           |                           |                           |
| <i>a</i> , <i>b</i> , <i>c</i> (Å)                                | 81.9, 37.4, 62.3          | 81.6, 37.4, 62.2          | 81.6, 37.1, 62.1          | 81.6, 37.3, 62.2          |
| <i>a</i> , <i>b</i> , $\gamma$ (°)                                | 90, 96.7, 90              | 90, 96.6, 90              | 90, 96.4, 90              | 90, 96.4, 90              |
| Resolution (Å) <sup>1</sup>                                       | 20.0 - 1.40 (1.42 - 1.40) | 20.0 - 1.38 (1.41 - 1.38) | 20.0 - 1.43 (1.45 - 1.43) | 20.0 - 1.42 (1.45 - 1.42) |
| <i>R</i> <sub>pim</sub> <sup>1</sup>                              | 0.048 (0.643)             | 0.049 (0.686)             | 0.044 (0.941)             | 0.053 (0.844)             |
| <i>R</i> <sub>sym</sub> or <i>R</i> <sub>merge</sub> <sup>1</sup> | 0.071 (0.933)             | 0.073 (0.867)             | 0.063 (>1.0)              | 0.078 (>1.0)              |
| <i>I</i> / $\sigma$ ( <i>I</i> ) <sup>1</sup>                     | 11.4 (1.12)               | 10.3 (0.98)               | 12.0 (0.91)               | 11.8 (1.04)               |
| CC <sub>1/2</sub> <sup>1</sup>                                    | (0.502)                   | (0.376)                   | (0.349)                   | (0.361)                   |
| Completeness (%) <sup>1</sup>                                     | 99.7 (97.9)               | 96.9 (79.3)               | 98.9 (97.3)               | 99.6 (98.8)               |
| Redundancy <sup>1</sup>                                           | 3.0 (2.7)                 | 2.9 (2.0)                 | 3.0 (2.9)                 | 2.9 (2.7)                 |
| <b>Refinement</b>                                                 |                           |                           |                           |                           |
| Resolution (Å) <sup>1</sup>                                       | 19.3 - 1.40               | 18.7 - 1.38               | 20.1 - 1.43               | 19.9 - 1.42               |
| No. reflections <sup>1</sup>                                      | 36467                     | 36837                     | 33646                     | 34702                     |
| <i>R</i> <sub>work</sub> / <i>R</i> <sub>free</sub>               | 14.5 / 18.5               | 14.9 / 17.0               | 15.1 / 18.5               | 14.8 / 18.4               |
| No. atoms                                                         |                           |                           |                           |                           |
| Protein / RNA/ DNA                                                | 1990 / 122/ 121           | 1997 / 122 / 121          | 1997 / 122 / 121          | 2047 / 147 / 121          |
| Me <sup>2+</sup>                                                  | 2 Mg <sup>2+</sup>        | 2 Mg <sup>2+</sup>        | 2 Mg <sup>2+</sup>        | 2 Mg <sup>2+</sup>        |
| Me <sup>+4</sup>                                                  | 1 K <sup>+</sup>          | 1 K <sup>+</sup>          | 1 K <sup>+</sup>          | 3 K <sup>+</sup>          |
| Halides <sup>4</sup>                                              | 1 I <sup>-</sup>          | 2 I <sup>-</sup>          | 2 I <sup>-</sup>          | 3 I <sup>-</sup>          |
| Water/ Solvent                                                    | 203 / 44                  | 201 / 32                  | 201 / 32                  | 193 / 38                  |
| Occupancy                                                         |                           |                           |                           |                           |
| RS: PS                                                            | 1.0 : 0                   | 0.8 : 0                   | 0.8 : 0                   | 0.65 : 0.35               |
| A site                                                            | 1.0 Mg <sup>2+</sup>      | 1.0 Mg <sup>2+</sup>      | 1.0 Mg <sup>2+</sup>      | 1.0 Mg <sup>2+</sup>      |
| B site                                                            | 1.0 Mg <sup>2+</sup>      | 1.0 Mg <sup>2+</sup>      | 1.0 Mg <sup>2+</sup>      | 1.0 Mg <sup>2+</sup>      |
| U site                                                            | 0.10 K <sup>+</sup>       | 0.15 K <sup>+</sup>       | 0.15 K <sup>+</sup>       | 0.25 K <sup>+</sup>       |
| W site                                                            | 0 K <sup>+</sup>          | 0 K <sup>+</sup>          | 0 K <sup>+</sup>          | 0.25 K <sup>+</sup>       |
| B-factors                                                         |                           |                           |                           |                           |
| Macromolecules                                                    | 30.0                      | 31.4                      | 31.0                      | 28.0                      |
| Me <sub>A</sub> / Lig <sub>A</sub> <sup>2</sup>                   | 23.5 / 28.1               | 26.7 / 30.9               | 27.0 / 31.1               | 24.1 / 26.8               |
| Me <sub>B</sub> / Lig <sub>B</sub> <sup>2</sup>                   | 22.6 / 23.2               | 24.8 / 27.3               | 26.3 / 27.6               | 22.4 / 22.9               |
| Me <sub>U</sub> / Lig <sub>U</sub> <sup>2</sup>                   | NA                        | 28.6 / 35.8               | 29.5 / 34.6               | 29.9 / 28.9               |
| Me <sub>W</sub> / Lig <sub>W</sub> <sup>2</sup>                   | NA                        | NA                        | NA                        | 32.2 / 31.9               |
| Solvent <sup>3</sup>                                              | 46.2                      | 47.5                      | 46.2                      | 44.0                      |
| R.m.s deviations                                                  |                           |                           |                           |                           |
| Bond lengths (Å)                                                  | 0.007                     | 0.008                     | 0.007                     | 0.009                     |
| Bond angles (°)                                                   | 1.07                      | 1.00                      | 1.00                      | 1.22                      |

<sup>1</sup> Data in the highest resolution shell is shown in the parenthesis.<sup>2</sup> B-factors of metal ions and their protein, solvent, and nucleotide ligands.<sup>3</sup> Water, ethylene glycol and glycerol<sup>4</sup> B factors and occupancies are not listed for non-catalytic monovalent cations and halides

(7) RNase H1<sup>WT</sup> 120 s reaction with 2 mM Mg<sup>2+</sup> and 5-300 mM K<sup>+</sup> (Fig. 2b)-Cont'd

|                                                                   | 100 mM (1)<br>PDB 6DON    | 100 mM (2)<br>PDB 6DOO    | 200 mM (1)<br>PDB 6DOP    |
|-------------------------------------------------------------------|---------------------------|---------------------------|---------------------------|
| <b>Data collection</b>                                            |                           |                           |                           |
| Space group                                                       | C 1 2 1                   | C 1 2 1                   | C 1 2 1                   |
| Cell dimensions                                                   |                           |                           |                           |
| <i>a</i> , <i>b</i> , <i>c</i> (Å)                                | 81.9, 37.6, 62.1          | 81.5, 37.7, 62.4          | 81.5, 37.6, 61.8          |
| <i>a</i> , <i>b</i> , $\gamma$ (°)                                | 90, 96.4, 90              | 90, 96.2, 90              | 90, 95.8, 90              |
| Resolution (Å) <sup>1</sup>                                       | 20.0 - 1.42 (1.44 - 1.42) | 20.0 - 1.44 (1.47 - 1.44) | 20.0 - 1.25 (1.28 - 1.25) |
| <i>R</i> <sub>pim</sub> <sup>1</sup>                              | 0.055 (0.955)             | 0.042 (0.850)             | 0.057 (0.651)             |
| <i>R</i> <sub>sym</sub> or <i>R</i> <sub>merge</sub> <sup>1</sup> | 0.077 (>1.0)              | 0.061 (>1.0)              | 0.085 (0.902)             |
| <i>I</i> / $\sigma$ ( <i>I</i> ) <sup>1</sup>                     | 10.5 (1.14)               | 13.5 (0.81)               | 8.27 (1.17)               |
| CC <sub>1/2</sub> <sup>1</sup>                                    | (0.316)                   | (0.350)                   | (0.465)                   |
| Completeness (%) <sup>1</sup>                                     | 99.1 (99.6)               | 99.7 (99.0)               | 95.8 (86.0)               |
| Redundancy <sup>1</sup>                                           | 3.0 (2.7)                 | 3.0 (2.9)                 | 3.1 (2.5)                 |
| <b>Refinement</b>                                                 |                           |                           |                           |
| Resolution (Å) <sup>1</sup>                                       | 18.8 - 1.42               | 18.9 - 1.44               | 19.9 - 1.25               |
| No. reflections <sup>1</sup>                                      | 34701                     | 34009                     | 48949                     |
| <i>R</i> <sub>work</sub> / <i>R</i> <sub>free</sub>               | 15.6 / 19.5               | 14.5 / 17.0               | 16.2 / 17.8               |
| No. atoms                                                         |                           |                           |                           |
| Protein / RNA/ DNA                                                | 2047 / 147 / 121          | 2047 / 147 / 121          | 2047 / 147 / 121          |
| Mg <sup>2+</sup>                                                  | 2 Mg <sup>2+</sup>        | 2 Mg <sup>2+</sup>        | 2 Mg <sup>2+</sup>        |
| K <sup>+</sup>                                                    | 3 K <sup>+</sup>          | 3 K <sup>+</sup>          | 2 K <sup>+</sup>          |
| Halides <sup>4</sup>                                              | 4 I <sup>-</sup>          | 4 I <sup>-</sup>          | 4 I <sup>-</sup>          |
| Water/ Solvent                                                    | 184 / 44                  | 184 / 44                  | 180 / 44                  |
| Occupancy                                                         |                           |                           |                           |
| RS: PS                                                            | 0.50 : 0.50               | 0.65 : 0.35               | 0.70 : 0.30               |
| A site                                                            | 1.0 Mg <sup>2+</sup>      | 1.0 Mg <sup>2+</sup>      | 1.0 Mg <sup>2+</sup>      |
| B site                                                            | 1.0 Mg <sup>2+</sup>      | 1.0 Mg <sup>2+</sup>      | 1.0 Mg <sup>2+</sup>      |
| U site                                                            | 0.25 K <sup>+</sup>       | 0.25 K <sup>+</sup>       | 0.25 K <sup>+</sup>       |
| W site                                                            | 0.25 K <sup>+</sup>       | 0.25 K <sup>+</sup>       | 0 K <sup>+</sup>          |
| B-factors                                                         |                           |                           |                           |
| Macromolecules                                                    | 30.0                      | 28.5                      | 25.9                      |
| Me <sub>A</sub> / Lig <sub>A</sub> <sup>2</sup>                   | 25.2 / 31.7               | 22.1 / 26.2               | 24.8 / 29.3               |
| Me <sub>B</sub> / Lig <sub>B</sub> <sup>2</sup>                   | 26.3 / 27.9               | 21.1 / 26.1               | 22.8 / 24.4               |
| Me <sub>U</sub> / Lig <sub>U</sub> <sup>2</sup>                   | 32.5 / 32.0               | 27.5 / 27.4               | 30.9 / 32.8               |
| Me <sub>W</sub> / Lig <sub>W</sub> <sup>2</sup>                   | 28.8 / 42.5               | 24.7 / 44.7               | NA                        |
| Solvent <sup>3</sup>                                              | 46.8                      | 44.4                      | 40.9                      |
| R.m.s deviations                                                  |                           |                           |                           |
| Bond lengths (Å)                                                  | 0.008                     | 0.009                     | 0.007                     |
| Bond angles (°)                                                   | 1.15                      | 1.21                      | 1.15                      |

<sup>1</sup> Data in the highest resolution shell is shown in the parenthesis.<sup>2</sup> B-factors of metal ions and their protein, solvent, and nucleotide ligands.<sup>3</sup> Water, ethylene glycol and glycerol<sup>4</sup> B factors and occupancies are not listed for non-catalytic monovalent cations and halides

**(8) RNase H1<sup>WT</sup> 120 s reaction with 2 mM Mg<sup>2+</sup> and 5-300 mM K<sup>+</sup> (Fig. 2b)-Cont'd**

|                                                                   | 200 mM (2)<br>PDB <b>6DOQ</b> | 300 mM (1)<br>PDB <b>6DOR</b> | 300 mM (2)<br>PDB <b>6DOS</b> |
|-------------------------------------------------------------------|-------------------------------|-------------------------------|-------------------------------|
| <b>Data collection</b>                                            |                               |                               |                               |
| Space group                                                       | C 1 2 1                       | C 1 2 1                       | C 1 2 1                       |
| Cell dimensions                                                   |                               |                               |                               |
| <i>a, b, c</i> (Å)                                                | 81.4, 37.9, 61.8              | 81.5, 37.7, 62.8              | 81.2, 37.4, 62.0              |
| <i>a, b, γ</i> (°)                                                | 90, 96.0, 90                  | 90, 96.6, 90                  | 90, 96.0, 90                  |
| Resolution (Å) <sup>1</sup>                                       | 20.0 - 1.42 (1.45 - 1.42)     | 20.0 - 1.50 (1.53 - 1.50)     | 20.0 - 1.32 (1.34 - 1.32)     |
| <i>R</i> <sub>pim</sub> <sup>1</sup>                              | 0.049 (0.786)                 | 0.037 (0.745)                 | 0.036 (0.782)                 |
| <i>R</i> <sub>sym</sub> or <i>R</i> <sub>merge</sub> <sup>1</sup> | 0.072 (>1.0)                  | 0.054 (>1.0)                  | 0.051 (>1.0)                  |
| <i>I</i> / <i>σ</i> ( <i>I</i> ) <sup>1</sup>                     | 12.7 (0.99)                   | 16.6 (1.04)                   | 16.0 (0.95)                   |
| CC <sub>1/2</sub> <sup>1</sup>                                    | (0.291)                       | (0.368)                       | (0.316)                       |
| Completeness (%) <sup>1</sup>                                     | 99.6 (99.7)                   | 99.7 (96.7)                   | 99.7 (99.3)                   |
| Redundancy <sup>1</sup>                                           | 3.0 (2.8)                     | 3.0 (2.5)                     | 3.0 (2.9)                     |
| <b>Refinement</b>                                                 |                               |                               |                               |
| Resolution (Å) <sup>1</sup>                                       | 19.8 - 1.42                   | 19.4 - 1.50                   | 19.8 - 1.32                   |
| No. reflections <sup>1</sup>                                      | 35101                         | 30500                         | 43775                         |
| <i>R</i> <sub>work</sub> / <i>R</i> <sub>free</sub>               | 14.9 / 17.7                   | 15.5 / 19.4                   | 15.5 / 17.1                   |
| No. atoms                                                         |                               |                               |                               |
| Protein / RNA/ DNA                                                | 2047 / 147 / 121              | 2047 / 147 / 121              | 2047 / 147 / 121              |
| Mg <sup>2+</sup>                                                  | 2 Mg <sup>2+</sup>            | 2 Mg <sup>2+</sup>            | 2 Mg <sup>2+</sup>            |
| Me <sup>+4</sup>                                                  | 3 K <sup>+</sup>              | 3 K <sup>+</sup>              | 2 K <sup>+</sup>              |
| Halides <sup>4</sup>                                              | 4 I <sup>-</sup>              | 4 I <sup>-</sup>              | 4 I <sup>-</sup>              |
| Water/ Solvent                                                    | 180 / 44                      | 177 / 44                      | 177 / 44                      |
| Occupancy                                                         |                               |                               |                               |
| RS: PS                                                            | 0.65 : 0.35                   | 0.50 : 0.50                   | 0.70 : 0.30                   |
| A site                                                            | 1.0 Mg <sup>2+</sup>          | 1.0 Mg <sup>2+</sup>          | 1.0 Mg <sup>2+</sup>          |
| B site                                                            | 1.0 Mg <sup>2+</sup>          | 1.0 Mg <sup>2+</sup>          | 1.0 Mg <sup>2+</sup>          |
| U site                                                            | 0.25 K <sup>+</sup>           | 0.25 K <sup>+</sup>           | 0.25 K <sup>+</sup>           |
| W site                                                            | 0.15 K <sup>+</sup>           | 0.25 K <sup>+</sup>           | 0 K <sup>+</sup>              |
| B-factors                                                         |                               |                               |                               |
| Macromolecules                                                    | 28.1                          | 28.9                          | 26.0                          |
| Me <sub>A</sub> / Lig <sub>A</sub> <sup>2</sup>                   | 24.7 / 26.2                   | 25.7 / 27.3                   | 25.2 / 26.8                   |
| Me <sub>B</sub> / Lig <sub>B</sub> <sup>2</sup>                   | 22.7 / 25.6                   | 24.8 / 25.8                   | 23.2 / 23.1                   |
| Me <sub>U</sub> / Lig <sub>U</sub> <sup>2</sup>                   | 30.0 / 31.1                   | 32.0 / 31.2                   | 31.8 / 29.9                   |
| Me <sub>W</sub> / Lig <sub>W</sub> <sup>2</sup>                   | 24.6 / 42.4                   | 32.1 / 31.2                   | NA                            |
| Solvent <sup>3</sup>                                              | 42.8                          | 44.0                          | 40.7                          |
| R.m.s deviations                                                  |                               |                               |                               |
| Bond lengths (Å)                                                  | 0.008                         | 0.009                         | 0.008                         |
| Bond angles (°)                                                   | 1.14                          | 1.17                          | 1.20                          |

<sup>1</sup> Data in the highest resolution shell is shown in the parenthesis.<sup>2</sup> B-factors of metal ions and their protein, solvent, and nucleotide ligands.<sup>3</sup> Water, ethylene glycol and glycerol<sup>4</sup> B factors and occupancies are not listed for non-catalytic monovalent cations and halides

(9) RNase H1<sup>WT</sup> reaction with 5 mM Mg<sup>2+</sup> and 200 mM Rb<sup>+</sup> (Fig. S2b)

|                                                                   | 40 s<br>PDB 6DOT          | 120 s<br>PDB 6DOU         |
|-------------------------------------------------------------------|---------------------------|---------------------------|
| <b>Data collection</b>                                            |                           |                           |
| Space group                                                       | C 1 2 1                   | C 1 2 1                   |
| Cell dimensions                                                   |                           |                           |
| <i>a, b, c</i> (Å)                                                | 81.6, 37.2, 62.1          | 81.4, 37.7, 61.9          |
| <i>a, b, γ</i> (°)                                                | 90, 96.6, 90              | 90, 96.0, 90              |
| Resolution (Å) <sup>1</sup>                                       | 30.0 - 1.42 (1.45 - 1.43) | 20.0 - 1.48 (1.52 - 1.49) |
| <i>R</i> <sub>pim</sub> <sup>1</sup>                              | 0.042 (0.460)             | 0.035 (0.605)             |
| <i>R</i> <sub>sym</sub> or <i>R</i> <sub>merge</sub> <sup>1</sup> | 0.120 (>1.0)              | 0.105 (>1.0)              |
| <i>I</i> / <i>σ</i> ( <i>I</i> ) <sup>1</sup>                     | 15.5 (2.00)               | 17.2 (1.00)               |
| CC <sub>1/2</sub> <sup>1</sup>                                    | (0.365)                   | (0.824)                   |
| Completeness (%) <sup>1</sup>                                     | 100.0 (99.9)              | 96.6 (87.7)               |
| Redundancy <sup>1</sup>                                           | 8.5 (5.6)                 | 9.3 (5.4)                 |
| <b>Refinement</b>                                                 |                           |                           |
| Resolution (Å) <sup>1</sup>                                       | 23.4 - 1.42               | 19.1 - 1.48               |
| No. reflections <sup>1</sup>                                      | 34770                     | 29597                     |
| <i>R</i> <sub>work</sub> / <i>R</i> <sub>free</sub>               | 14.2/ 16.8                | 15.2 / 18.4               |
| No. atoms                                                         |                           |                           |
| Protein / RNA/ DNA                                                | 1996 / 122 / 121          | 1999 / 135 / 121          |
| Me <sup>2+</sup>                                                  | 2 Mg <sup>2+</sup>        | 2 Mg <sup>2+</sup>        |
| Me <sup>+4</sup>                                                  | 3 Rb <sup>+</sup>         | 5 Rb <sup>+</sup>         |
| Halides <sup>4</sup>                                              | 3 Cl <sup>-</sup>         | 3 Cl <sup>-</sup>         |
| Water/ Solvent                                                    | 214 / 34                  | 188 / 40                  |
| Occupancy                                                         |                           |                           |
| RS: PS                                                            | 1.0 : 0                   | 0.50 : 0.50               |
| A site                                                            | 1.0 Mg <sup>2+</sup>      | 1.0 Mg <sup>2+</sup>      |
| B site                                                            | 1.0 Mg <sup>2+</sup>      | 1.0 Mg <sup>2+</sup>      |
| U site                                                            | 0.35 Rb <sup>+</sup>      | 0.10 Rb <sup>+</sup>      |
| V site                                                            | 0                         | 0.10 Rb <sup>+</sup>      |
| W site                                                            | 0                         | 0.25 Rb <sup>+</sup>      |
| B-factors                                                         |                           |                           |
| Macromolecules                                                    | 25.4                      | 31.3                      |
| Me <sub>A</sub> / Lig <sub>A</sub> <sup>2</sup>                   | 20.1 / 29.0               | 25.6 / 32.2               |
| Me <sub>B</sub> / Lig <sub>B</sub> <sup>2</sup>                   | 20.2 / 21.8               | 25.3 / 28.7               |
| Me <sub>U</sub> / Lig <sub>U</sub> <sup>2</sup>                   | 40.0 / 36.0               | 29.2 / 34.5               |
| Me <sub>U</sub> / Lig <sub>V</sub> <sup>2</sup>                   | NA                        | 37.0 / 37.0               |
| Me <sub>W</sub> / Lig <sub>W</sub> <sup>2</sup>                   | NA                        | 32.0 / 28.4               |
| Solvent <sup>3</sup>                                              | 41.6                      | 45.5                      |
| R.m.s deviations                                                  |                           |                           |
| Bond lengths (Å)                                                  | 0.007                     | 0.008                     |
| Bond angles (°)                                                   | 1.01                      | 1.08                      |

<sup>1</sup> Data in the highest resolution shell is shown in the parenthesis.<sup>2</sup> B-factors of metal ions and their protein, solvent, and nucleotide ligands.<sup>3</sup> Water, ethylene glycol and glycerol<sup>4</sup> B factors and occupancies are not listed for non-catalytic monovalent cations and halides

(10) RNase H1<sup>WT</sup> reaction with 5 mM Mg<sup>2+</sup> and 200 mM Rb<sup>+</sup> (Fig. S2c)

|                                                                   | 80 s<br>PDB 6DOV          | 160 s<br>PDB 6DOW         | 240 s<br>PDB 6DPP         | 360 s<br>PDB 6DOX         |
|-------------------------------------------------------------------|---------------------------|---------------------------|---------------------------|---------------------------|
| <b>Data collection</b>                                            |                           |                           |                           |                           |
| Space group                                                       | C 1 2 1                   | C 1 2 1                   | C 1 2 1                   | C 1 2 1                   |
| Cell dimensions                                                   |                           |                           |                           |                           |
| <i>a</i> , <i>b</i> , <i>c</i> (Å)                                | 81.6, 37.4, 61.7          | 82.0, 37.5, 62.5          | 81.5, 38.0, 62.5          | 81.3, 37.9, 62.1          |
| <i>a</i> , <i>b</i> , $\gamma$ (°)                                | 90, 96.6, 90              | 90, 96.8, 90              | 90, 96.8, 90              | 90, 96.7, 90              |
| Resolution (Å) <sup>1</sup>                                       | 20.0 - 1.52 (1.55 - 1.52) | 20.0 - 1.50 (1.53 - 1.50) | 20.0 - 1.45 (1.47 - 1.45) | 20.0 - 1.45 (1.47 - 1.45) |
| <i>R</i> <sub>pim</sub> <sup>1</sup>                              | 0.032 (0.666)             | 0.040 (>1.0)              | 0.037 (0.750)             | 0.029 (0.778)             |
| <i>R</i> <sub>sym</sub> or <i>R</i> <sub>merge</sub> <sup>1</sup> | 0.098 (>1.0)              | 0.114 (>1.0)              | 0.106 (>1.0)              | 0.053 (>1.0)              |
| <i>I</i> / $\sigma$ ( <i>I</i> ) <sup>1</sup>                     | 22.0 (0.90)               | 14.9 (0.90)               | 17.5 (0.96)               | 23.9 (0.97)               |
| CC <sub>1/2</sub> <sup>1</sup>                                    | (0.456)                   | (0.868)                   | (0.293)                   | (0.495)                   |
| Completeness (%) <sup>1</sup>                                     | 99.2 (92.1)               | 99.8 (97.1)               | 98.5 (83.3)               | 99.7 (99.5)               |
| Redundancy <sup>1</sup>                                           | 10.9 (5.6)                | 9.3 (4.9)                 | 8.9 (3.7)                 | 8.8 (8.1)                 |
| <b>Refinement</b>                                                 |                           |                           |                           |                           |
| Resolution (Å) <sup>1</sup>                                       | 20.0 - 1.52               | 19.4 - 1.50               | 19.4 - 1.45               | 19.3 - 1.45               |
| No. reflections <sup>1</sup>                                      | 28106                     | 30353                     | 33303                     | 33565                     |
| <i>R</i> <sub>work</sub> / <i>R</i> <sub>free</sub>               | 15.3 / 19.0               | 16.4 / 19.8               | 15.1 / 17.1               | 15.4 / 17.5               |
| No. atoms                                                         |                           |                           |                           |                           |
| Protein / RNA / DNA                                               | 1996 / 135 / 121          | 1987 / 135 / 121          | 1963 / 135 / 121          | 1997 / 135 / 121          |
| Mg <sup>2+</sup>                                                  | 2 Mg <sup>2+</sup>        | 2 Mg <sup>2+</sup>        | 2 Mg <sup>2+</sup>        | 2 Mg <sup>2+</sup>        |
| Me <sup>+4</sup>                                                  | 5 Rb <sup>+</sup>         | 5 Rb <sup>+</sup>         | 5 Rb <sup>+</sup>         | 5 Rb <sup>+</sup>         |
| Halides <sup>4</sup>                                              | 3 Cl <sup>-</sup>         | 3 Cl <sup>-</sup>         | 3 Cl <sup>-</sup>         | 3 Cl <sup>-</sup>         |
| Water / Solvent                                                   | 207 / 28                  | 179 / 34                  | 180 / 38                  | 184 / 61                  |
| Occupancy                                                         |                           |                           |                           |                           |
| RS: PS                                                            | 0.75 : 0.25               | 0.35 : 0.65               | 0.30 : 0.70               | 0.30 : 0.70               |
| A site                                                            | 1.0 Mg <sup>2+</sup>      | 1.0 Mg <sup>2+</sup>      | 1.0 Mg <sup>2+</sup>      | 1.0 Mg <sup>2+</sup>      |
| B site                                                            | 1.0 Mg <sup>2+</sup>      | 1.0 Mg <sup>2+</sup>      | 1.0 Mg <sup>2+</sup>      | 1.0 Mg <sup>2+</sup>      |
| U site                                                            | 0.15 Rb <sup>+</sup>      | 0.10 Rb <sup>+</sup>      | 0.10 Rb <sup>+</sup>      | 0.10 Rb <sup>+</sup>      |
| V site                                                            | 0.10 Rb <sup>+</sup>      | 0.10 Rb <sup>+</sup>      | 0.10 Rb <sup>+</sup>      | 0.10 Rb <sup>+</sup>      |
| W site                                                            | 0.15 Rb <sup>+</sup>      | 0.30 Rb <sup>+</sup>      | 0.30 Rb <sup>+</sup>      | 0.30 Rb <sup>+</sup>      |
| B-factors                                                         |                           |                           |                           |                           |
| Macromolecules                                                    | 29.0                      | 34.5                      | 26.9                      | 26.3                      |
| Me <sub>A</sub> / Lig <sub>A</sub> <sup>2</sup>                   | 23.8 / 33.4               | 26.9 / 34.1               | 20.9 / 23.4               | 19.6 / 23.9               |
| Me <sub>B</sub> / Lig <sub>B</sub> <sup>2</sup>                   | 19.8 / 26.3               | 28.0 / 31.2               | 20.0 / 21.5               | 18.4 / 21.4               |
| Me <sub>U</sub> / Lig <sub>U</sub> <sup>2</sup>                   | 37.6 / 34.3               | 35.9 / 36.2               | 31.8 / 26.4               | 32.1 / 26.9               |
| Me <sub>V</sub> / Lig <sub>V</sub> <sup>2</sup>                   | 36.5 / 43.2               | 37.7 / 37.1               | 32.6 / 23.0               | 34.4 / 22.3               |
| Me <sub>W</sub> / Lig <sub>W</sub> <sup>2</sup>                   | 37.0 / 36.3               | 30.7 / 27.8               | 25.3 / 20.8               | 22.7 / 18.7               |
| Solvent <sup>3</sup>                                              | 40.5                      | 46.3                      | 41.3                      | 40.0                      |
| R.m.s deviations                                                  |                           |                           |                           |                           |
| Bond lengths (Å)                                                  | 0.008                     | 0.008                     | 0.008                     | 0.008                     |
| Bond angles (°)                                                   | 1.16                      | 1.03                      | 1.02                      | 1.07                      |

<sup>1</sup> Data in the highest resolution shell is shown in the parenthesis.<sup>2</sup> B-factors of metal ions and their protein, solvent, and nucleotide ligands.<sup>3</sup> Water, ethylene glycol and glycerol<sup>4</sup> B factors and occupancies are not listed for non-catalytic monovalent cations and halides

(11) RNase H1<sup>WT</sup> reaction with 2 mM Mg<sup>2+</sup> and 200 mM Li<sup>+</sup> (Fig. S2d)

|                                                                   | 120 s                     |
|-------------------------------------------------------------------|---------------------------|
|                                                                   | PDB <a href="#">6DOY</a>  |
| <b>Data collection</b>                                            |                           |
| Space group                                                       | C 1 2 1                   |
| Cell dimensions                                                   |                           |
| <i>a</i> , <i>b</i> , <i>c</i> (Å)                                | 81.9, 37.4, 62.0          |
| <i>a</i> , <i>b</i> , $\gamma$ (°)                                | 90, 96.8, 90              |
| Resolution (Å) <sup>1</sup>                                       | 20.0 - 1.45 (1.47 - 1.45) |
| <i>R</i> <sub>pim</sub> <sup>1</sup>                              | 0.049 (0.776)             |
| <i>R</i> <sub>sym</sub> or <i>R</i> <sub>merge</sub> <sup>1</sup> | 0.083 (>1.0)              |
| <i>I</i> / $\sigma$ ( <i>I</i> ) <sup>1</sup>                     | 13.1 (0.97)               |
| CC <sub>1/2</sub> <sup>1</sup>                                    | (0.433)                   |
| Completeness (%) <sup>1</sup>                                     | 96.0 (92.9)               |
| Redundancy <sup>1</sup>                                           | 3.8 (3.4)                 |
| <b>Refinement</b>                                                 |                           |
| Resolution (Å) <sup>1</sup>                                       | 19.3 - 1.45               |
| No. reflections <sup>1</sup>                                      | 31921                     |
| <i>R</i> <sub>work</sub> / <i>R</i> <sub>free</sub>               | 14.8 / 18.7               |
| No. atoms                                                         |                           |
| Protein / RNA/ DNA                                                | 2019 / 122 / 121          |
| Me <sup>+</sup> <sup>4</sup>                                      | 2 Li <sup>+</sup>         |
| Halides <sup>4</sup>                                              | 4 I <sup>-</sup>          |
| Water/ Solvent                                                    | 188 / 44                  |
| Occupancy                                                         |                           |
| RS: PS                                                            | 1.0 : 0                   |
| A site                                                            | 1.0 Li <sup>+</sup>       |
| B site                                                            | 0.7 Li <sup>+</sup>       |
| B-factors                                                         |                           |
| Macromolecules                                                    | 31.4                      |
| Me <sub>A</sub> / Lig <sub>A</sub> <sup>2</sup>                   | 20.7 / 25.6               |
| Me <sub>B</sub> / Lig <sub>B</sub> <sup>2</sup>                   | 23.6 / 24.5               |
| Solvent <sup>3</sup>                                              | 47.1                      |
| R.m.s deviations                                                  |                           |
| Bond lengths (Å)                                                  | 0.007                     |
| Bond angles (°)                                                   | 1.22                      |

<sup>1</sup> Data in the highest resolution shell is shown in the parenthesis.

<sup>2</sup> B-factors of metal ions and their protein, solvent, and nucleotide ligands.

<sup>3</sup> Water, ethylene glycol and glycerol

<sup>4</sup> B factors and occupancies are not listed for non-catalytic monovalent cations and halides

(12) RNase H1<sup>WT</sup> 40 s reaction with 1-80 mM Mg<sup>2+</sup> and 75 mM K<sup>+</sup> (Fig. 3a)

|                                                                   | 1 mM<br>PDB 6DOZ          | 2.5 mM<br>PDB 6DPO        | 5 mM<br>PDB 6DP1          | 7.5 mM<br>PDB 6DP2        |
|-------------------------------------------------------------------|---------------------------|---------------------------|---------------------------|---------------------------|
| <b>Data collection</b>                                            |                           |                           |                           |                           |
| Space group                                                       | C 1 2 1                   | C 1 2 1                   | C 1 2 1                   | C 1 2 1                   |
| Cell dimensions                                                   |                           |                           |                           |                           |
| <i>a</i> , <i>b</i> , <i>c</i> (Å)                                | 81.6, 37.5, 62.5          | 81.5, 37.8, 61.8          | 81.8, 37.4, 61.8          | 81.4, 37.3, 62.3          |
| <i>a</i> , <i>b</i> , $\gamma$ (°)                                | 90, 90.7, 90              | 90, 96.1, 90              | 90, 96.5, 90              | 90, 96.6, 90              |
| Resolution (Å) <sup>1</sup>                                       | 20.0 - 1.57 (1.63 - 1.57) | 20.0 - 1.45 (1.47 - 1.45) | 20.0 - 1.42 (1.44 - 1.42) | 19.9 - 1.66 (1.72 - 1.66) |
| <i>R</i> <sub>pim</sub> <sup>1</sup>                              | 0.027 (0.682)             | 0.057 (0.702)             | 0.042 (0.870)             | 0.045 (0.779)             |
| <i>R</i> <sub>sym</sub> or <i>R</i> <sub>merge</sub> <sup>1</sup> | 0.040 (0.916)             | 0.083 (0.977)             | 0.061 (1.231)             | 0.063 (1.075)             |
| <i>I</i> / $\sigma$ ( <i>I</i> ) <sup>1</sup>                     | 21.7 (0.90)               | 11.3 (1.09)               | 14.6 (0.95)               | 13.8 (0.86)               |
| CC <sub>1/2</sub> <sup>1</sup>                                    | 0.999 (0.438)             | (0.206)                   | (0.373)                   | 0.995 (0.385)             |
| Completeness (%) <sup>1</sup>                                     | 98.9 (87.8)               | 88.6 (93.4)               | 98.0 (94.2)               | 96.7 (93.0)               |
| Redundancy <sup>1</sup>                                           | 3.0 (2.4)                 | 3.0 (2.8)                 | 3.0 (2.8)                 | 3.0 (2.7)                 |
| <b>Refinement</b>                                                 |                           |                           |                           |                           |
| Resolution (Å) <sup>1</sup>                                       | 19.4 - 1.57               | 19.1 - 1.45               | 19.2 - 1.42               | 19.9 - 1.66               |
| No. reflections <sup>1</sup>                                      | 25891                     | 29457                     | 34456                     | 21230                     |
| <i>R</i> <sub>work</sub> / <i>R</i> <sub>free</sub>               | 15.2 / 18.5               | 19.0 / 23.6               | 15.3 / 19.0               | 15.7 / 19.6               |
| No. atoms                                                         |                           |                           |                           |                           |
| Protein / RNA/ DNA                                                | 2048 / 122 / 121          | 2054 / 122 / 121          | 2054 / 122 / 121          | 2048 / 122 / 121          |
| Mg <sup>2+</sup>                                                  | 2 Mg <sup>2+</sup>        | 2 Mg <sup>2+</sup>        | 2 Mg <sup>2+</sup>        | 2 Mg <sup>2+</sup>        |
| K <sup>+</sup>                                                    | 2 K <sup>+</sup>          | 2 K <sup>+</sup>          | 2 K <sup>+</sup>          | 2 K <sup>+</sup>          |
| Halides <sup>4</sup>                                              | 3 I <sup>-</sup>          | 4 I <sup>-</sup>          | 4 I <sup>-</sup>          | 4 I <sup>-</sup>          |
| Water/ Solvent                                                    | 169 / 26                  | 182 / 32                  | 199 / 32                  | 159 / 28                  |
| Occupancy                                                         |                           |                           |                           |                           |
| RS: PS                                                            | 0.95 : 0.15               | 0.90 : 0.10               | 0.80 : 0.20               | 0.85 : 0.15               |
| A site                                                            | 1.0 Mg <sup>2+</sup>      | 1.0 Mg <sup>2+</sup>      | 1.0 Mg <sup>2+</sup>      | 1.0 Mg <sup>2+</sup>      |
| B site                                                            | 1.0 Mg <sup>2+</sup>      | 1.0 Mg <sup>2+</sup>      | 1.0 Mg <sup>2+</sup>      | 1.0 Mg <sup>2+</sup>      |
| U site                                                            | 0.2 K <sup>+</sup>        | 0.35 K <sup>+</sup>       | 0.3 K <sup>+</sup>        | 0.35 K <sup>+</sup>       |
| W site                                                            | 0                         | 0                         | 0                         | 0                         |
| B-factors                                                         |                           |                           |                           |                           |
| Macromolecules                                                    | 37.3                      | 28.6                      | 28.6                      | 36.8                      |
| Me <sub>A</sub> / Lig <sub>A</sub> <sup>2</sup>                   | 32.8 / 37.2               | 26.3 / 29.3               | 26.5 / 27.4               | 31.0 / 31.3               |
| Me <sub>B</sub> / Lig <sub>B</sub> <sup>2</sup>                   | 33.4 / 29.0               | 27.9 / 22.0               | 24.6 / 22.3               | 28.4 / 29.0               |
| Me <sub>U</sub> / Lig <sub>U</sub> <sup>2</sup>                   | 54.1 / 40.9               | 47.5 / 34.0               | 45.2 / 33.53              | 54.5 / 33.9               |
| Me <sub>W</sub> / Lig <sub>W</sub> <sup>2</sup>                   | NA                        | NA                        |                           |                           |
| Solvent <sup>3</sup>                                              | 47.0                      | 41.8                      | 42.4                      | 45.3                      |
| R.m.s deviations                                                  |                           |                           |                           |                           |
| Bond lengths (Å)                                                  | 0.008                     | 0.008                     | 0.007                     | 0.008                     |
| Bond angles (°)                                                   | 1.06                      | 0.98                      | 1.00                      | 1.04                      |

<sup>1</sup> Data in the highest resolution shell is shown in the parenthesis.<sup>2</sup> B-factors of metal ions and their protein, solvent, and nucleotide ligands.<sup>3</sup> Water, ethylene glycol and glycerol<sup>4</sup> B factors and occupancies are not listed for non-catalytic monovalent cations and halides

(13) RNase H1<sup>WT</sup> 40 s reaction with 1-80 mM Mg<sup>2+</sup> and 75 mM K<sup>+</sup> (Fig. 3a and S3a)

|                                                                   | 10 mM<br>PDB 6DP3         | 20 mM<br>PDB 6DP4         | 40 mM<br>PDB 6DP5         | 80 mM<br>PDB 6DP6         |
|-------------------------------------------------------------------|---------------------------|---------------------------|---------------------------|---------------------------|
| <b>Data collection</b>                                            |                           |                           |                           |                           |
| Space group                                                       | C 1 2 1                   | C 1 2 1                   | C 1 2 1                   | C 1 2 1                   |
| Cell dimensions                                                   |                           |                           |                           |                           |
| <i>a</i> , <i>b</i> , <i>c</i> (Å)                                | 81.5, 38.1, 61.7          | 81.5, 37.7, 62.1          | 81.9, 37.5, 62.2          | 81.8, 37.3, 62.6          |
| <i>a</i> , <i>b</i> , $\gamma$ (°)                                | 90, 96.0, 90              | 90, 96.5, 90              | 90, 96.5, 90              | 90, 96.7, 90              |
| Resolution (Å) <sup>1</sup>                                       | 20.0 - 1.46 (1.49 - 1.46) | 20.0 - 1.38 (1.40 - 1.38) | 20.0 - 1.43 (1.45 - 1.43) | 20.0 - 1.40 (1.42 - 1.40) |
| <i>R</i> <sub>pim</sub> <sup>1</sup>                              | 0.046 (0.692)             | 0.033 (0.708)             | 0.046 (0.735)             | 0.063 (0.706)             |
| <i>R</i> <sub>sym</sub> or <i>R</i> <sub>merge</sub> <sup>1</sup> | 0.067 (0.969)             | 0.048 (0.964)             | 0.065 (0.928)             | 0.085 (0.814)             |
| <i>I</i> / $\sigma$ ( <i>I</i> ) <sup>1</sup>                     | 15.1 (1.07)               | 17.0 (1.07)               | 11.3 (1.20)               | 7.8 (1.01)                |
| CC <sub>1/2</sub> <sup>1</sup>                                    | (0.434)                   | (0.371)                   | 0.990 (0.278)             | 0.986 (0.409)             |
| Completeness (%) <sup>1</sup>                                     | 99.5 (98.8)               | 97.3 (99.0)               | 94.0 (86.6)               | 90.4 (78.5)               |
| Redundancy <sup>1</sup>                                           | 2.9 (2.7)                 | 2.8 (2.7)                 | 2.6 (2.1)                 | 2.3 (1.7)                 |
| <b>Refinement</b>                                                 |                           |                           |                           |                           |
| Resolution (Å) <sup>1</sup>                                       | 19.1 - 1.46               | 19.2 - 1.38               | 20.0 - 1.43               | 19.4 - 1.40               |
| No. reflections <sup>1</sup>                                      | 32665                     | 37958                     | 32560                     | 33058                     |
| <i>R</i> <sub>work</sub> / <i>R</i> <sub>free</sub>               | 17.1 / 19.8               | 15.7 / 17.6               | 15.3 / 17.6               | 16.3 / 18.6               |
| No. atoms                                                         |                           |                           |                           |                           |
| Protein / RNA/ DNA                                                | 2103 / 135 / 121          | 2073 / 135 / 121          | 2076 / 135 / 121          | 2099 / 135 / 121          |
| Mg <sup>2+</sup>                                                  | 2 Mg <sup>2+</sup>        | 2 Mg <sup>2+</sup>        | 2 Mg <sup>2+</sup>        | 2 Mg <sup>2+</sup>        |
| K <sup>+</sup>                                                    | 3 K <sup>+</sup>          | 3 K <sup>+</sup>          | 3 K <sup>+</sup>          | 3 K <sup>+</sup>          |
| Halides <sup>4</sup>                                              | 3 I <sup>-</sup>          | 3 I <sup>-</sup>          | 4 I <sup>-</sup>          | 4 I <sup>-</sup>          |
| Water/ Solvent                                                    | 134 / 54                  | 182 / 42                  | 140 / 8                   | 147 / 28                  |
| Occupancy                                                         |                           |                           |                           |                           |
| RS: PS                                                            | 0.30 : 0.70               | 0.20 : 0.80               | 0.35 : 0.65               | 0.15 : 0.85               |
| A site                                                            | 1.0 Mg <sup>2+</sup>      | 1.0 Mg <sup>2+</sup>      | 1.0 Mg <sup>2+</sup>      | 1.0 Mg <sup>2+</sup>      |
| B site                                                            | 1.0 Mg <sup>2+</sup>      | 1.0 Mg <sup>2+</sup>      | 1.0 Mg <sup>2+</sup>      | 1.0 Mg <sup>2+</sup>      |
| U site                                                            | 0.10 K <sup>+</sup>       | 0.10 K <sup>+</sup>       | 0.1 K <sup>+</sup>        | 0.10 K <sup>+</sup>       |
| W site                                                            | 0.35 K <sup>+</sup>       | 0.40 K <sup>+</sup>       | 0.35 K <sup>+</sup>       | 0.40 K <sup>+</sup>       |
| B-factors                                                         |                           |                           |                           |                           |
| Macromolecules                                                    | 28.9                      | 26.2                      | 27.2                      | 26.1                      |
| Me <sub>A</sub> / Lig <sub>A</sub> <sup>2</sup>                   | 20.7 / 25.7               | 21.4 / 25.5               | 22.4 / 26.9               | 19.0 / 22.0               |
| Me <sub>B</sub> / Lig <sub>B</sub> <sup>2</sup>                   | 19.4 / 24.2               | 20.6 / 23.3               | 21.5 / 24.3               | 18.8 / 22.0               |
| Me <sub>U</sub> / Lig <sub>U</sub> <sup>2</sup>                   | 33.8 / 31.8               | 27.2 / 27.7               | 30.3 / 31.5               | 16.6 / 23.9               |
| Me <sub>W</sub> / Lig <sub>W</sub> <sup>2</sup>                   | 33.2 / 24.8               | 28.5 / 26.3               | 37.8 / 24.3               | 28.1 / 24.6               |
| Solvent <sup>3</sup>                                              | 42                        | 39.9                      | 37.8                      | 35.5                      |
| R.m.s deviations                                                  |                           |                           |                           |                           |
| Bond lengths (Å)                                                  | 0.008                     | 0.008                     | 0.008                     | 0.008                     |
| Bond angles (°)                                                   | 1.08                      | 1.07                      | 1.20                      | 1.03                      |

<sup>1</sup> Data in the highest resolution shell is shown in the parenthesis.<sup>2</sup> B-factors of metal ions and their protein, solvent, and nucleotide ligands.<sup>3</sup> Water, ethylene glycol and glycerol<sup>4</sup> B factors and occupancies are not listed for non-catalytic monovalent cations and halides



(14) RNase H1<sup>WT</sup> reaction with 500 mM Mn<sup>2+</sup> and 200 mM K<sup>+</sup> (Fig. 3b)

---

|                                                                   |                           |
|-------------------------------------------------------------------|---------------------------|
|                                                                   | 40 s                      |
|                                                                   | PDB <a href="#">6DP7</a>  |
| <hr/>                                                             |                           |
| <b>Data collection</b>                                            |                           |
| Space group                                                       | C 1 2 1                   |
| Cell dimensions                                                   |                           |
| <i>a</i> , <i>b</i> , <i>c</i> (Å)                                | 82.0, 37.6, 61.9          |
| <i>a</i> , <i>b</i> , $\gamma$ (°)                                | 90, 96.8, 90              |
| Resolution (Å) <sup>1</sup>                                       | 20.0 - 1.40 (1.43 - 1.40) |
| <i>R</i> <sub>pim</sub> <sup>1</sup>                              | 0.105 (>1.0)              |
| <i>R</i> <sub>sym</sub> or <i>R</i> <sub>merge</sub> <sup>1</sup> | 0.249 (>1.0)              |
| <i>I</i> / $\sigma$ ( <i>I</i> ) <sup>1</sup>                     | 6.8 (3.8)                 |
| CC <sub>1/2</sub> <sup>1</sup>                                    | (0.179)                   |
| Completeness (%) <sup>1</sup>                                     | 99.5 (100)                |
| Redundancy <sup>1</sup>                                           | 7.7 (7.4)                 |
| <br>                                                              |                           |
| <b>Refinement</b>                                                 |                           |
| Resolution (Å) <sup>1</sup>                                       | 17.98 - 1.38              |
| No. reflections <sup>1</sup>                                      | 38088                     |
| <i>R</i> <sub>work</sub> / <i>R</i> <sub>free</sub>               | 17.7 / 20.1               |
| No. atoms                                                         |                           |
| Protein / RNA/ DNA                                                | 1873 / 118 / 121          |
| Me <sup>2+</sup>                                                  | 4 Mn <sup>2+</sup>        |
| Me <sup>4+</sup>                                                  | 1 K <sup>+</sup>          |
| Halides <sup>4</sup>                                              | 3 I <sup>-</sup>          |
| Water/ Solvent                                                    | 169 / 8                   |
| Occupancy                                                         |                           |
| RS: PS                                                            | 0 : 1.0                   |
| A site                                                            | 1.0 Mn <sup>2+</sup>      |
| B site                                                            | 1.0 Mn <sup>2+</sup>      |
| W site                                                            | 0.40 K <sup>+</sup>       |
| B-factors                                                         |                           |
| Macromolecules                                                    | 28.7                      |
| Me <sub>A</sub> / Lig <sub>A</sub> <sup>2</sup>                   | 18.3 / 23.6               |
| Me <sub>B</sub> / Lig <sub>B</sub> <sup>2</sup>                   | 18.0 / 19.3               |
| Me <sub>W</sub> / Lig <sub>W</sub> <sup>2</sup>                   | 32.7 / 20.0               |
| Solvent <sup>3</sup>                                              | 39.2                      |
| R.m.s deviations                                                  |                           |
| Bond lengths (Å)                                                  | 0.006                     |
| Bond angles (°)                                                   | 0.94                      |

---

<sup>1</sup> Data in the highest resolution shell is shown in the parenthesis.

<sup>2</sup> B-factors of metal ions and their protein, solvent, and nucleotide ligands.

<sup>3</sup> Water, ethylene glycol and glycerol

<sup>4</sup> B factors and occupancies are not listed for non-catalytic monovalent cations and halides

(15) RNase H1<sup>WT</sup> reaction with 5 mM Mg<sup>2+</sup> and 200 mM Li<sup>+</sup> (Fig.3c)

240 s  
PDB [6DP8](#)

**Data collection**

|                                                                   |                           |
|-------------------------------------------------------------------|---------------------------|
| Space group                                                       | C 1 2 1                   |
| Cell dimensions                                                   |                           |
| <i>a</i> , <i>b</i> , <i>c</i> (Å)                                | 81.4, 37.7, 61.8          |
| <i>a</i> , <i>b</i> , $\gamma$ (°)                                | 90, 95.4, 90              |
| Resolution (Å) <sup>1</sup>                                       | 50.0 - 1.32 (1.37 - 1.32) |
| <i>R</i> <sub>pim</sub> <sup>1</sup>                              | 0.032 (0.671)             |
| <i>R</i> <sub>sym</sub> or <i>R</i> <sub>merge</sub> <sup>1</sup> | 0.047 (0.891)             |
| <i>I</i> / $\sigma$ ( <i>I</i> ) <sup>1</sup>                     | 21.9 (1.07)               |
| CC <sub>1/2</sub> <sup>1</sup>                                    | (0.413)                   |
| Completeness (%) <sup>1</sup>                                     | 94.7 (71.4)               |
| Redundancy <sup>1</sup>                                           | 3.0 (2.4)                 |

**Refinement**

|                                                     |                      |
|-----------------------------------------------------|----------------------|
| Resolution (Å) <sup>1</sup>                         | 23.5 - 1.32          |
| No. reflections <sup>1</sup>                        | 41833                |
| <i>R</i> <sub>work</sub> / <i>R</i> <sub>free</sub> | 14.7 / 17.0          |
| No. atoms                                           |                      |
| Protein / RNA/ DNA                                  | 2037 / 122 / 121     |
| Me <sup>2+</sup>                                    | 2 Mg <sup>2+</sup>   |
| Me <sup>+4</sup>                                    | 1 Li <sup>+</sup>    |
| Halides <sup>4</sup>                                | 3 Cl <sup>-</sup>    |
| Water/ Solvent                                      | 208 / 56             |
| Occupancy                                           |                      |
| RS: PS                                              | 0:1.0                |
| A site                                              | 1.0 Mg <sup>2+</sup> |
| B site                                              | 1.0 Li <sup>+</sup>  |
| C site                                              | 1.0 Mg <sup>2+</sup> |
| B-factors                                           |                      |
| Macromolecules                                      | 22.2                 |
| Me <sub>A</sub> / Lig <sub>A</sub> <sup>2</sup>     | 17.8 / 18.1          |
| Me <sub>B</sub> / Lig <sub>B</sub> <sup>2</sup>     | 17.0 / 15.5          |
| Me <sub>C</sub> / Lig <sub>C</sub> <sup>2</sup>     | 19.5 / 20.2          |
| Solvent <sup>3</sup>                                | 38.5                 |
| R.m.s deviations                                    |                      |
| Bond lengths (Å)                                    | 0.007                |
| Bond angles (°)                                     | 1.06                 |

<sup>1</sup> Data in the highest resolution shell is shown in the parenthesis.

<sup>2</sup> B-factors of metal ions and their protein, solvent, and nucleotide ligands.

<sup>3</sup> Water, ethylene glycol and glycerol

<sup>4</sup> B factors and occupancies are not listed for non-catalytic monovalent cations and halides

(16) RNase H1<sup>WT</sup> 40 s reaction with 2-40 mM Mn<sup>2+</sup> and 200 mM K<sup>+</sup> (Fig. S3c)

|                                                                   | 2 mM<br>PDB <b>6DP9</b>                     | 4 mM<br>PDB <b>6DPA</b> | 8 mM<br>PDB <b>6DPB</b> | 12 mM<br>PDB <b>6DPC</b> |
|-------------------------------------------------------------------|---------------------------------------------|-------------------------|-------------------------|--------------------------|
| <b>Data collection</b>                                            |                                             |                         |                         |                          |
| Space group                                                       | C 1 2 1                                     | C 1 2 1                 | C 1 2 1                 | C 1 2 1                  |
| Cell dimensions                                                   |                                             |                         |                         |                          |
| <i>a</i> , <i>b</i> , <i>c</i> (Å)                                | 81.1, 38.0, 61.4                            | 81.2, 37.7, 62.1        | 81.5, 37.3, 62.2        | 81.8, 37.4, 61.9         |
| <i>a</i> , <i>b</i> , $\gamma$ (°)                                | 90, 96.0, 90                                | 90, 96.2, 90            | 90, 96.8, 90            | 90, 96.8, 90             |
| Resolution (Å) <sup>1</sup>                                       | 20.0-1.40 (1.42-1.40)                       | 20.0-1.49 (1.52-1.49)   | 50.0-1.33 (1.35-1.33)   | 20.0-1.34 (1.36-1.34)    |
| <i>R</i> <sub>pim</sub> <sup>1</sup>                              | 0.031 (0.636)                               | 0.042 (0.618)           | 0.032 (0.81)            | 0.041 (0.699)            |
| <i>R</i> <sub>sym</sub> or <i>R</i> <sub>merge</sub> <sup>1</sup> | 0.046 (0.910)                               | 0.062 (0.868)           | 0.046 (>1.0)            | 0.061 (0.966)            |
| <i>I</i> / $\sigma$ ( <i>I</i> ) <sup>1</sup>                     | 20.0 (1.20)                                 | 13.0 (1.06)             | 20.4 (0.88)             | 14.2 (1.04)              |
| CC <sub>1/2</sub> <sup>1</sup>                                    | (0.570)                                     | (0.282)                 | (0.380)                 | (0.462)                  |
| Completeness (%) <sup>1</sup>                                     | 91.8 (90.2)                                 | 96.0 (98.3)             | 94.9 (86.8)             | 92.6 (90.0)              |
| Redundancy <sup>1</sup>                                           | 3.0 (2.8)                                   | 2.8 (2.6)               | 3.1 (2.5)               | 2.9 (2.5)                |
| <b>Refinement</b>                                                 |                                             |                         |                         |                          |
| Resolution (Å) <sup>1</sup>                                       | 19.0-1.40                                   | 19.2-1.49               | 32.1-1.32               | 19.2-1.34                |
| No. reflections <sup>1</sup>                                      | 33786                                       | 34029                   | 41029                   | 38831                    |
| <i>R</i> <sub>work</sub> / <i>R</i> <sub>free</sub>               | 15.1 / 18.4                                 | 15.4 / 18.8             | 14.8 / 17.2             | 14.9 / 18.0              |
| No. atoms                                                         |                                             |                         |                         |                          |
| Protein / RNA/ DNA                                                | 2013 / 122 / 121                            | 1955 / 135 / 121        | 1919 / 135 / 121        | 1919 / 135 / 121         |
| Me <sup>2+</sup>                                                  | 2 Mn <sup>2+</sup>                          | 2 Mn <sup>2+</sup>      | 4 Mn <sup>2+</sup>      | 5 Mn <sup>2+</sup>       |
| Me <sup>+</sup>                                                   | 3 K <sup>+</sup>                            | 3 K <sup>+</sup>        | 3 K <sup>+</sup>        | 3 K <sup>+</sup>         |
| Halides <sup>4</sup>                                              | 4 I <sup>-</sup>                            | 4 I <sup>-</sup>        | 4 I <sup>-</sup>        | 4 I <sup>-</sup>         |
| Water/ Solvent                                                    | 181 / 32                                    | 169 / 30                | 212 / 36                | 213 / 36                 |
| Occupancy                                                         |                                             |                         |                         |                          |
| RS: PS                                                            | 1.0 : 0                                     | 0.70 : 0.30             | 0.40 : 0.60             | 0.30 : 0.70              |
| A site                                                            | 0.65 Mn <sup>2+</sup> / 0.35 K <sup>+</sup> | 0.80 Mn <sup>2+</sup>   | 1.0 Mn <sup>2+</sup>    | 1.0 Mn <sup>2+</sup>     |
| B site                                                            | 0.30 Mn <sup>2+</sup> / 0.35 K <sup>+</sup> | 0.90 Mn <sup>2+</sup>   | 1.0 Mn <sup>2+</sup>    | 1.0 Mn <sup>2+</sup>     |
| C site                                                            | 0                                           | 0                       | 0                       | 0                        |
| U site                                                            | 0                                           | 0.20 K <sup>+</sup>     | 0.20 K <sup>+</sup>     | 0.15 K <sup>+</sup>      |
| W site                                                            | 0                                           | 0.20 K <sup>+</sup>     | 0.30 K <sup>+</sup>     | 0.40 K <sup>+</sup>      |
| B-factors                                                         |                                             |                         |                         |                          |
| Macromolecules                                                    | 27.5                                        | 27.8                    | 25.5                    | 23.7                     |
| Me <sub>A</sub> / Lig <sub>A</sub> <sup>2</sup>                   | 28.7 / 40.8                                 | 24.6 / 28.4             | 19.4 / 22.2             | 17.5 / 19.4              |
| Me <sub>B</sub> / Lig <sub>B</sub> <sup>2</sup>                   | 23.8 / 28.3                                 | 25.3 / 25.7             | 18.0 / 21.9             | 16.2 / 18.9              |
| Me <sub>C</sub> / Lig <sub>C</sub> <sup>2</sup>                   | NA                                          | NA                      | NA                      | NA                       |
| Me <sub>U</sub> / Lig <sub>U</sub> <sup>2</sup>                   | NA                                          | 28.2 / 25.6             | 24.2 / 23.8             | 19.9 / 21.0              |
| Me <sub>W</sub> / Lig <sub>W</sub> <sup>2</sup>                   | NA                                          | 25.4 / 15.8             | 23.0 / 16.0             | 26.7 / 18.0              |
| Solvent <sup>3</sup>                                              | 43.6                                        | 42.4                    | 40.1                    | 37.6                     |
| R.m.s deviations                                                  |                                             |                         |                         |                          |
| Bond lengths (Å)                                                  | 0.007                                       | 0.008                   | 0.007                   | 0.007                    |
| Bond angles (°)                                                   | 0.99                                        | 1.14                    | 1.06                    | 1.06                     |

<sup>1</sup> Data in the highest resolution shell is shown in the parenthesis.<sup>2</sup> B-factors of metal ions and their protein, solvent, and nucleotide ligands.<sup>3</sup> Water, ethylene glycol and glycerol<sup>4</sup> B factors and occupancies are not listed for non-catalytic monovalent cations and halides

(17) RNase H1<sup>WT</sup> 40 s reaction with 2-40 mM Mn<sup>2+</sup> and 200 mM K<sup>+</sup> (Fig. S3c)-Cont'd

|                                                                   | 16 mM<br>PDB <b>6DPD</b> | 20 mM<br>PDB <b>6DPE</b> | 40 mM<br>PDB <b>6DPF</b> |
|-------------------------------------------------------------------|--------------------------|--------------------------|--------------------------|
| <b>Data collection</b>                                            |                          |                          |                          |
| Space group                                                       | C 1 2 1                  | C 1 2 1                  | C 1 2 1                  |
| Cell dimensions                                                   |                          |                          |                          |
| <i>a</i> , <i>b</i> , <i>c</i> (Å)                                | 81.3, 38.0, 61.3         | 81.0, 38.5, 60.6         | 81.7, 37.6, 61.2         |
| <i>a</i> , <i>b</i> , $\gamma$ (°)                                | 90, 96.3, 90             | 90, 96.0, 90             | 90, 96.2, 90             |
| Resolution (Å) <sup>1</sup>                                       | 20.0-1.46 (1.49-1.46)    | 20.0-1.58 (1.61-1.58)    | 19.9-2.0                 |
| <i>R</i> <sub>pim</sub> <sup>1</sup>                              | 0.044 (0.686)            | 0.098 (0.682)            | 0.069 (0.744)            |
| <i>R</i> <sub>sym</sub> or <i>R</i> <sub>merge</sub> <sup>1</sup> | 0.068 (0.973)            | 0.141 (0.944)            | 0.102 (>1.0)             |
| <i>I</i> / $\sigma$ ( <i>I</i> ) <sup>1</sup>                     | 14.8 (1.12)              | 6.7 (1.05)               | 7.6 (0.83)               |
| CC <sub>1/2</sub> <sup>1</sup>                                    | (0.530)                  | (0.339)                  | (0.383)                  |
| Completeness (%) <sup>1</sup>                                     | 99.4 (98.4)              | 95.2 (95.8)              | 98.0 (95.0)              |
| Redundancy <sup>1</sup>                                           | 3.2 (2.8)                | 2.9 (2.7)                | 2.7 (2.5)                |
| <b>Refinement</b>                                                 |                          |                          |                          |
| Resolution (Å) <sup>1</sup>                                       | 19.8-1.46                | 18.8-1.56                | 19.9-1.56                |
| No. reflections <sup>1</sup>                                      | 32500                    | 24895                    | 25955                    |
| <i>R</i> <sub>work</sub> / <i>R</i> <sub>free</sub>               | 15.0 / 17.1              | 17.2 / 21.6              | 16.2 / 20.7              |
| No. atoms                                                         |                          |                          |                          |
| Protein / RNA/ DNA                                                | 1900 / 123 / 121         | 1900 / 123 / 121         | 1900 / 123 / 121         |
| Mn <sup>2+</sup>                                                  | 6 Mn <sup>2+</sup>       | 5 Mn <sup>2+</sup>       | 5 Mn <sup>2+</sup>       |
| K <sup>+</sup>                                                    | 1 K <sup>+</sup>         | 1 K <sup>+</sup>         | 1 K <sup>+</sup>         |
| Halides <sup>4</sup>                                              | 5 I <sup>-</sup>         | 5 I <sup>-</sup>         | 5 I <sup>-</sup>         |
| Water/ Solvent                                                    | 186 / 47                 | 167 / 44                 | 167 / 44                 |
| Occupancy                                                         |                          |                          |                          |
| RS: PS                                                            | 0 : 1.0                  | 0 : 1.0                  | 0 : 1.0                  |
| A site                                                            | 1.0 Mn <sup>2+</sup>     | 1.0 Mn <sup>2+</sup>     | 1.0 Mn <sup>2+</sup>     |
| B site                                                            | 1.0 Mn <sup>2+</sup>     | 1.0 Mn <sup>2+</sup>     | 1.0 Mn <sup>2+</sup>     |
| C site                                                            | 0.15 Mn <sup>2+</sup>    | 0                        | 0                        |
| U site                                                            | 0                        | 0                        | 0                        |
| W site                                                            | 0.60 K <sup>+</sup>      | 0.60 K <sup>+</sup>      | 0.60 K <sup>+</sup>      |
| B-factors                                                         |                          |                          |                          |
| Macromolecules                                                    | 28.4                     | 29.2                     | 32.1                     |
| Me <sub>A</sub> / Lig <sub>A</sub> <sup>2</sup>                   | 20.4 / 20.5              | 19.1 / 19.2              | 22.2 / 21.5              |
| Me <sub>B</sub> / Lig <sub>B</sub> <sup>2</sup>                   | 19.3 / 20.3              | 17.7 / 19.5              | 21.1 / 21.8              |
| Me <sub>C</sub> / Lig <sub>C</sub> <sup>2</sup>                   | 26.1 / 23.9              | NA                       | NA                       |
| Me <sub>U</sub> / Lig <sub>U</sub> <sup>2</sup>                   | NA                       | NA                       | NA                       |
| Me <sub>W</sub> / Lig <sub>W</sub> <sup>2</sup>                   | 33.3 / 21.1              | 30.9 / 23.4              | 34.2 / 22.4              |
| Solvent <sup>3</sup>                                              | 43.0                     | 38.5                     | 41.6                     |
| R.m.s deviations                                                  |                          |                          |                          |
| Bond lengths (Å)                                                  | 0.007                    | 0.008                    | 0.008                    |
| Bond angles (°)                                                   | 0.97                     | 0.98                     | 1.05                     |

<sup>1</sup> Data in the highest resolution shell is shown in the parenthesis.<sup>2</sup> B-factors of metal ions and their protein, solvent, and nucleotide ligands.<sup>3</sup> Water, ethylene glycol and glycerol<sup>4</sup> B factors and occupancies are not listed for non-catalytic monovalent cations and halides

(18) RNase H1<sup>E188A</sup> reaction with 4 mM Mn<sup>2+</sup> and 200 mM K<sup>+</sup> (Fig. 4b)

240 s  
PDB [6DPG](#)

**Data collection**

|                                                                   |                           |
|-------------------------------------------------------------------|---------------------------|
| Space group                                                       | C 1 2 1                   |
| Cell dimensions                                                   |                           |
| <i>a</i> , <i>b</i> , <i>c</i> (Å)                                | 81.6, 37.6, 62.0          |
| <i>a</i> , <i>b</i> , $\gamma$ (°)                                | 90, 96.6, 90              |
| Resolution (Å) <sup>1</sup>                                       | 20.0 - 1.38 (1.40 - 1.38) |
| <i>R</i> <sub>pim</sub> <sup>1</sup>                              | 0.047 (0.782)             |
| <i>R</i> <sub>sym</sub> or <i>R</i> <sub>merge</sub> <sup>1</sup> | 0.070 (>1.0)              |
| <i>I</i> / $\sigma$ ( <i>I</i> ) <sup>1</sup>                     | 13.1 (1.03)               |
| CC <sub>1/2</sub> <sup>1</sup>                                    | (0.373)                   |
| Completeness (%) <sup>1</sup>                                     | 96.4 (93.8)               |
| Redundancy <sup>1</sup>                                           | 3.1 (2.8)                 |

**Refinement**

|                                                     |                       |
|-----------------------------------------------------|-----------------------|
| Resolution (Å) <sup>1</sup>                         | 20.0 - 1.38           |
| No. reflections <sup>1</sup>                        | 37154                 |
| <i>R</i> <sub>work</sub> / <i>R</i> <sub>free</sub> | 15.9 / 17.5           |
| No. atoms                                           |                       |
| Protein / RNA/ DNA                                  | 2225 / 173 / 121      |
| Me <sup>2+</sup>                                    | 4 Mn <sup>2+</sup>    |
| Me <sup>+4</sup>                                    | 3 K <sup>+</sup>      |
| Halides <sup>4</sup>                                | 3 I <sup>-</sup>      |
| Water/ Solvent                                      | 177 / 44              |
| Occupancy                                           |                       |
| RS: PS                                              | 0.20 : 0.80           |
| A site                                              | 0.90 Mn <sup>2+</sup> |
| B site                                              | 1.0 Mn <sup>2+</sup>  |
| C site                                              | 0.40 Mn <sup>2+</sup> |
| W site                                              | 0.40 K <sup>+</sup>   |
| B-factors                                           |                       |
| Macromolecules                                      | 31.0                  |
| Me <sub>A</sub> / Lig <sub>A</sub> <sup>2</sup>     | 20.7 / 23.9           |
| Me <sub>B</sub> / Lig <sub>B</sub> <sup>2</sup>     | 21.0 / 22.7           |
| Me <sub>C</sub> / Lig <sub>C</sub> <sup>2</sup>     | 29.2 / 28.4           |
| Me <sub>W</sub> / Lig <sub>W</sub> <sup>2</sup>     | 31.8 / 25.3           |
| Solvent <sup>3</sup>                                | 45.9                  |
| R.m.s deviations                                    |                       |
| Bond lengths (Å)                                    | 0.008                 |
| Bond angles (°)                                     | 1.26                  |

<sup>1</sup> Data in the highest resolution shell is shown in the parenthesis.

<sup>2</sup> B-factors of metal ions and their protein, solvent, and nucleotide ligands.

<sup>3</sup> Water, ethylene glycol and glycerol

<sup>4</sup> B factors and occupancies are not listed for non-catalytic monovalent cations and halides

(19) RNase H1<sup>E188A</sup> reaction with 2 mM Mg<sup>2+</sup> and 200 mM K<sup>+</sup> (Fig. 4c)

120 s  
PDB [6DPH](#)

**Data collection**

|                                                                   |                           |
|-------------------------------------------------------------------|---------------------------|
| Space group                                                       | C 1 2 1                   |
| Cell dimensions                                                   |                           |
| <i>a</i> , <i>b</i> , <i>c</i> (Å)                                | 80.9, 37.1, 61.8          |
| <i>a</i> , <i>b</i> , <i>γ</i> (°)                                | 90, 96.3, 90              |
| Resolution (Å) <sup>1</sup>                                       | 50.0 - 1.35 (1.37 - 1.35) |
| <i>R</i> <sub>pim</sub> <sup>1</sup>                              | 0.029 (0.547)             |
| <i>R</i> <sub>sym</sub> or <i>R</i> <sub>merge</sub> <sup>1</sup> | 0.043 (0.775)             |
| <i>I</i> / <i>σ</i> ( <i>I</i> ) <sup>1</sup>                     | 19.1 (1.09)               |
| CC <sub>1/2</sub> <sup>1</sup>                                    | (0.524)                   |
| Completeness (%) <sup>1</sup>                                     | 98.5 (86.0)               |
| Redundancy <sup>1</sup>                                           | 2.9 (2.5)                 |

**Refinement**

|                                                     |                                                                 |
|-----------------------------------------------------|-----------------------------------------------------------------|
| Resolution (Å) <sup>1</sup>                         | 23.2 - 1.34                                                     |
| No. reflections <sup>1</sup>                        | 40257                                                           |
| <i>R</i> <sub>work</sub> / <i>R</i> <sub>free</sub> | 16.0 / 19.2                                                     |
| No. atoms                                           |                                                                 |
| Protein / RNA/ DNA                                  | 2105 / 122 / 121                                                |
| Me <sup>2+</sup>                                    | 2 Mg <sup>2+</sup>                                              |
| Me <sup>+4</sup>                                    | 3 K <sup>+</sup>                                                |
| Halides <sup>4</sup>                                | 4 I <sup>-</sup>                                                |
| Water/ Solvent                                      | 202 / 46                                                        |
| Occupancy                                           |                                                                 |
| RS: PS                                              | 1.0 : 0                                                         |
| A site                                              | 0.60 Mg <sup>2+</sup> / 0.40 K <sup>+</sup>                     |
| B site                                              | 0.60 Mg <sup>2+</sup> / 0.40 K <sup>+</sup>                     |
| C site                                              | 0                                                               |
| B-factors                                           |                                                                 |
| Macromolecules                                      | 26.6                                                            |
| Me <sub>A</sub> / Lig <sub>A</sub> <sup>2</sup>     | 24.6 / 21.4 (Mg <sup>2+</sup> ) , 16.3 / 20.5 (K <sup>+</sup> ) |
| Me <sub>B</sub> / Lig <sub>B</sub> <sup>2</sup>     | 16.7 / 27.6 (Mg <sup>2+</sup> ) , 17.9 / 20.5 (K <sup>+</sup> ) |
| Me <sub>C</sub> / Lig <sub>C</sub> <sup>2</sup>     | NA                                                              |
| Solvent <sup>3</sup>                                | 41.2                                                            |
| R.m.s deviations                                    |                                                                 |
| Bond lengths (Å)                                    | 0.009                                                           |
| Bond angles (°)                                     | 1.06                                                            |

<sup>1</sup> Data in the highest resolution shell is shown in the parenthesis.

<sup>2</sup> B-factors of metal ions and their protein, solvent, and nucleotide ligands.

<sup>3</sup> Water, ethylene glycol and glycerol

<sup>4</sup> B factors and occupancies are not listed for non-catalytic monovalent cations and halides

(20) RNase H1<sup>K196A</sup> reaction with 10 mM Mg<sup>2+</sup> and 200 mM Rb<sup>+</sup> (Fig. 4d)

40 s

PDB [6DPI](#)

**Data collection**

|                                                                   |                           |
|-------------------------------------------------------------------|---------------------------|
| Space group                                                       | C 1 2 1                   |
| Cell dimensions                                                   |                           |
| <i>a</i> , <i>b</i> , <i>c</i> (Å)                                | 81.6, 37.3, 62.4          |
| <i>a</i> , <i>b</i> , $\gamma$ (°)                                | 90, 97.0, 90              |
| Resolution (Å) <sup>1</sup>                                       | 20.0 - 1.35 (1.37 - 1.35) |
| <i>R</i> <sub>sym</sub> or <i>R</i> <sub>merge</sub> <sup>1</sup> | 0.098 (>1.0)              |
| <i>R</i> <sub>pim</sub> <sup>1</sup>                              | 0.036 (0.702)             |
| <i>I</i> / $\sigma$ ( <i>I</i> ) <sup>1</sup>                     | 18.1 (0.99)               |
| CC <sub>1/2</sub> <sup>1</sup>                                    | (0.380)                   |
| Completeness (%) <sup>1</sup>                                     | 97.0 (91.7)               |
| Redundancy <sup>1</sup>                                           | 8.2 (3.8)                 |

**Refinement**

|                                                     |                      |
|-----------------------------------------------------|----------------------|
| Resolution (Å) <sup>1</sup>                         | 20.0 - 1.35          |
| No. reflections <sup>1</sup>                        | 40008                |
| <i>R</i> <sub>work</sub> / <i>R</i> <sub>free</sub> | 14.5 / 17.4          |
| No. atoms                                           |                      |
| Protein / RNA/ DNA                                  | 1981 / 122 / 121     |
| Me <sup>2+</sup>                                    | 2 Mg <sup>2+</sup>   |
| Me <sup>4</sup>                                     | 3 Rb <sup>+</sup>    |
| Halides <sup>4</sup>                                | 3 Cl <sup>-</sup>    |
| Water/ Solvent                                      | 203 / 36             |
| Occupancy                                           |                      |
| RS: PS                                              | 1.0 : 0              |
| A site                                              | 1.0 Mg <sup>2+</sup> |
| B site                                              | 1.0 Mg <sup>2+</sup> |
| U site                                              | 0.30 Rb <sup>+</sup> |
| V site                                              | 0                    |
| W site                                              | 0                    |
| B-factors                                           |                      |
| Macromolecules                                      | 24.1                 |
| Me <sub>A</sub> / Lig <sub>A</sub> <sup>2</sup>     | 16.7 / 21.4          |
| Me <sub>B</sub> / Lig <sub>B</sub> <sup>2</sup>     | 14.6 / 17.0          |
| Me <sub>U</sub> / Lig <sub>U</sub> <sup>2</sup>     | 27.2 / 22.2          |
| Me <sub>V</sub> / Lig <sub>V</sub> <sup>2</sup>     | NA                   |
| Me <sub>W</sub> / Lig <sub>W</sub> <sup>2</sup>     | NA                   |
| Solvent <sup>3</sup>                                | 40.4                 |
| R.m.s deviations                                    |                      |
| Bond lengths (Å)                                    | 0.008                |
| Bond angles (°)                                     | 1.28                 |

<sup>1</sup> Data in the highest resolution shell is shown in the parenthesis.

<sup>2</sup> B-factors of metal ions and their protein, solvent, and nucleotide ligands.

<sup>3</sup> Water, ethylene glycol and glycerol

<sup>4</sup> B factors and occupancies are not listed for non-catalytic monovalent cations and halides

(21) RNase H1<sup>K196A</sup> reaction with 4 mM Mn<sup>2+</sup> and 200 mM K<sup>+</sup> (Fig. S4a)

|                                                                   | 80 s<br>PDB <b>6DPJ</b>   | 240 s<br>PDB <b>6DPK</b>  |
|-------------------------------------------------------------------|---------------------------|---------------------------|
| <b>Data collection</b>                                            |                           |                           |
| Space group                                                       | C 1 2 1                   | C 1 2 1                   |
| Cell dimensions                                                   |                           |                           |
| <i>a</i> , <i>b</i> , <i>c</i> (Å)                                | 81.9, 37.5, 62.4          | 81.5, 37.6, 61.7          |
| <i>a</i> , <i>b</i> , $\gamma$ (°)                                | 90, 97.2, 90              | 90, 96.8, 90              |
| Resolution (Å) <sup>1</sup>                                       | 20.0 - 1.55 (1.60 - 1.57) | 20.0 - 1.39 (1.41 - 1.39) |
| <i>R</i> <sub>pim</sub> <sup>1</sup>                              | 0.077 (0.646)             | 0.051 (0.435)             |
| <i>R</i> <sub>sym</sub> or <i>R</i> <sub>merge</sub> <sup>1</sup> | 0.115 (0.882)             | 0.087 (0.718)             |
| <i>I</i> / $\sigma$ ( <i>I</i> ) <sup>1</sup>                     | 7.4 (0.97)                | 12.2 (1.46)               |
| CC <sub>1/2</sub> <sup>1</sup>                                    | (0.438)                   | (0.641)                   |
| Completeness (%) <sup>1</sup>                                     | 96.6 (77.2)               | 99.5 (96.0)               |
| Redundancy <sup>1</sup>                                           | 2.9 (2.1)                 | 3.6 (3.2)                 |
| <b>Refinement</b>                                                 |                           |                           |
| Resolution (Å) <sup>1</sup>                                       | 18.8 - 1.55               | 19.9 - 1.39               |
| No. reflections <sup>1</sup>                                      | 26181                     | 37272                     |
| <i>R</i> <sub>work</sub> / <i>R</i> <sub>free</sub>               | 17.4 / 21.4               | 14.3 / 16.8               |
| No. atoms                                                         |                           |                           |
| Protein / RNA/ DNA                                                | 2104 / 122 / 121          | 2224 / 172 / 121          |
| Me <sup>2+</sup>                                                  | 2 Mn <sup>2+</sup>        | 4 Mn <sup>2+</sup>        |
| Me <sup>+4</sup>                                                  | 2 K <sup>+</sup>          | 2 K <sup>+</sup>          |
| Halides <sup>4</sup>                                              | 4 I <sup>-</sup>          | 3 I <sup>-</sup>          |
| Water/ Solvent                                                    | 130 / 14                  | 189 / 44                  |
| Occupancy                                                         |                           |                           |
| RS: PS                                                            | 1.0 : 0                   | 0.20 : 0.80               |
| A site                                                            | 1.0 Mn <sup>2+</sup>      | 1.0 Mn <sup>2+</sup>      |
| B site                                                            | 1.0 Mn <sup>2+</sup>      | 1.0 Mn <sup>2+</sup>      |
| C site                                                            | NA                        | 0.40 Mn <sup>2+</sup>     |
| U site                                                            | 0.30 K <sup>+</sup>       | NA                        |
| W site                                                            | NA                        | 0.40 K <sup>+</sup>       |
| B-factors                                                         |                           |                           |
| Macromolecules                                                    | 37.4                      | 24.3                      |
| Me <sub>A</sub> / Lig <sub>A</sub> <sup>2</sup>                   | 28.9 / 31.5               | 18.0 / 23.2               |
| Me <sub>B</sub> / Lig <sub>B</sub> <sup>2</sup>                   | 27.6 / 29.9               | 17.0 / 17.5               |
| Me <sub>C</sub> / Lig <sub>C</sub> <sup>2</sup>                   | NA                        | 26.2 / 25.5               |
| Me <sub>U</sub> / Lig <sub>U</sub> <sup>2</sup>                   | 26.8 / 33.6               | NA                        |
| Me <sub>W</sub> / Lig <sub>W</sub> <sup>2</sup>                   | NA                        | 18.7 / 20.9               |
| Solvent <sup>3</sup>                                              | 42.5                      | 40.7                      |
| R.m.s deviations                                                  |                           |                           |
| Bond lengths (Å)                                                  | 0.008                     | 0.008                     |
| Bond angles (°)                                                   | 1.03                      | 1.09                      |

<sup>1</sup> Data in the highest resolution shell is shown in the parenthesis.<sup>2</sup> B-factors of metal ions and their protein, solvent, and nucleotide ligands.<sup>3</sup> Water, ethylene glycol and glycerol<sup>4</sup> B factors and occupancies are not listed for non-catalytic monovalent cations and halides



(22) RNase H1<sup>K196A</sup> reaction with 10 mM Mg<sup>2+</sup> and 200 mM Rb<sup>+</sup> (Fig. S4b)

|                                                                   | 720 s<br>PDB <b>6DPL</b>  | 1800 s<br>PDB <b>6DPM</b> |
|-------------------------------------------------------------------|---------------------------|---------------------------|
| <b>Data collection</b>                                            |                           |                           |
| Space group                                                       | C 1 2 1                   | C 1 2 1                   |
| Cell dimensions                                                   |                           |                           |
| <i>a</i> , <i>b</i> , <i>c</i> (Å)                                | 81.8, 37.5, 62.7          | 81.8, 37.4, 62.7          |
| <i>a</i> , <i>b</i> , $\gamma$ (°)                                | 90, 97.3, 90              | 90, 97.7, 90              |
| Resolution (Å) <sup>1</sup>                                       | 20.0 - 1.45 (1.47 - 1.45) | 20.0 - 1.68 (1.71 - 1.68) |
| <i>R</i> <sub>pim</sub> <sup>1</sup>                              | 0.038 (0.923)             | 0.053 (0.700)             |
| <i>R</i> <sub>sym</sub> or <i>R</i> <sub>merge</sub> <sup>1</sup> | 0.091 (>1.0)              | 0.123 (>1.0)              |
| <i>I</i> / $\sigma$ ( <i>I</i> ) <sup>1</sup>                     | 19.2 (1.0)                | 14.7 (1.15)               |
| CC <sub>1/2</sub> <sup>1</sup>                                    | (0.276)                   | (0.437)                   |
| Completeness (%) <sup>1</sup>                                     | 99.0 (91.7)               | 100 (100)                 |
| Redundancy <sup>1</sup>                                           | 8.0 (3.2)                 | 8.2 (6.7)                 |
| <b>Refinement</b>                                                 |                           |                           |
| Resolution (Å) <sup>1</sup>                                       | 19.5 - 1.45               | 20.1 - 1.68               |
| No. reflections <sup>1</sup>                                      | 33423                     | 21641                     |
| <i>R</i> <sub>work</sub> / <i>R</i> <sub>free</sub>               | 14.8 / 17.9               | 16.0 / 19.9               |
| No. atoms                                                         |                           |                           |
| Protein / RNA/ DNA                                                | 1989 / 145 / 121          | 1944 / 123 / 121          |
| Mg <sup>2+</sup>                                                  | 2 Mg <sup>2+</sup>        | 2 Mg <sup>2+</sup>        |
| Me <sup>+4</sup>                                                  | 6 Rb <sup>+</sup>         | 6 Rb <sup>+</sup>         |
| Halides <sup>4</sup>                                              | 3 Cl <sup>-</sup>         | 3 Cl <sup>-</sup>         |
| Water/ Solvent                                                    | 169 / 56                  | 181 / 40                  |
| Occupancy                                                         |                           |                           |
| RS: PS                                                            | 0.55 : 0.45               | 0 : 1.0                   |
| A site                                                            | 1.0 Mg <sup>2+</sup>      | 1.0 Mg <sup>2+</sup>      |
| B site                                                            | 1.0 Mg <sup>2+</sup>      | 1.0 Mg <sup>2+</sup>      |
| U site                                                            | 0.25 Rb <sup>+</sup>      | 0.20 Rb <sup>+</sup>      |
| V site                                                            | 0.20 Rb <sup>+</sup>      | 0.20 Rb <sup>+</sup>      |
| W site                                                            | 0.45 Rb <sup>+</sup>      | 0.70 Rb <sup>+</sup>      |
| B-factors                                                         |                           |                           |
| Macromolecules                                                    | 26.5                      | 24.8                      |
| Me <sub>A</sub> / Lig <sub>A</sub> <sup>2</sup>                   | 19.7 / 24.8               | 20.5 / 19.4               |
| Me <sub>B</sub> / Lig <sub>B</sub> <sup>2</sup>                   | 18.2 / 26.0               | 16.7 / 19.0               |
| Me <sub>U</sub> / Lig <sub>U</sub> <sup>2</sup>                   | 28.5 / 24.0               | 25.9 / 20.7               |
| Me <sub>V</sub> / Lig <sub>V</sub> <sup>2</sup>                   | 40.6                      | 37.04                     |
| Me <sub>W</sub> / Lig <sub>W</sub> <sup>2</sup>                   | 22.4 / 17.6               | 19.3 / 20.5               |
| Solvent <sup>3</sup>                                              | 42.3                      | 36.3                      |
| R.m.s deviations                                                  |                           |                           |
| Bond lengths (Å)                                                  | 0.007                     | 0.008                     |
| Bond angles (°)                                                   | 1.23                      | 1.22                      |

<sup>1</sup> Data in the highest resolution shell is shown in the parenthesis.<sup>2</sup> B-factors of metal ions and their protein, solvent, and nucleotide ligands.<sup>3</sup> Water, ethylene glycol and glycerol<sup>4</sup> B factors and occupancies are not listed for non-catalytic monovalent cations and halides

(23) RNase H1<sup>E188A</sup> reaction with 2 mM Mg<sup>2+</sup> and 200 mM K<sup>+</sup> (Fig. S5a and S5b)

|                                                                   | 200 s<br>PDB 6DPN         | 360 s<br>PDB 6DPO        |
|-------------------------------------------------------------------|---------------------------|--------------------------|
| <b>Data collection</b>                                            |                           |                          |
| Space group                                                       | C 1 2 1                   | C 1 2 1                  |
| Cell dimensions                                                   |                           |                          |
| <i>a</i> , <i>b</i> , <i>c</i> (Å)                                | 81.5, 37.6, 62.0          | 81.3, 38.0, 61.9         |
| <i>a</i> , <i>b</i> , $\gamma$ (°)                                | 90, 96.2, 90              | 90, 96.1, 90             |
| Resolution (Å) <sup>1</sup>                                       | 20.0 - 1.49 (1.53 - 1.50) | 20.0 - 1.45 (1.47- 1.45) |
| <i>R</i> <sub>sym</sub> or <i>R</i> <sub>merge</sub> <sup>1</sup> | 0.063 (0.858)             | 0.042 (0.988)            |
| <i>R</i> <sub>pim</sub> <sup>1</sup>                              | 0.044 (0.633)             | 0.028 (0.690)            |
| <i>I</i> / $\sigma$ ( <i>I</i> ) <sup>1</sup>                     | 14.5 (0.99)               | 24.2 ( 0.95)             |
| CC <sub>1/2</sub> <sup>1</sup>                                    | (0.561)                   | (0.526)                  |
| Completeness (%) <sup>1</sup>                                     | 98.4 (92.8)               | 98.4 (97.1)              |
| Redundancy <sup>1</sup>                                           | 2.7 (2.2)                 | 3.0 (2.8)                |
| <b>Refinement</b>                                                 |                           |                          |
| Resolution (Å) <sup>1</sup>                                       | 19.9 - 1.50               | 19.8 - 1.45              |
| No. reflections <sup>1</sup>                                      | 29802                     | 33161                    |
| <i>R</i> <sub>work</sub> / <i>R</i> <sub>free</sub>               | 16.2 / 18.3               | 16.2 / 19.0              |
| No. atoms                                                         |                           |                          |
| Protein / RNA/ DNA                                                | 2005 / 122 / 121          | 2115 / 151 / 121         |
| Mg <sup>2+</sup>                                                  | 2 Mg <sup>2+</sup>        | 3 Mg <sup>2+</sup>       |
| K <sup>+</sup>                                                    | 2 K <sup>+</sup>          | 1 K <sup>+</sup>         |
| Halides <sup>4</sup>                                              | 4 I <sup>-</sup>          | 4 I <sup>-</sup>         |
| Water/ Solvent                                                    | 185 / 36                  | 171 / 42                 |
| Occupancy                                                         |                           |                          |
| RS: PS                                                            | 1.0 : 0                   | 0.60 : 0.40              |
| A site                                                            | 1.0 Mg <sup>2+</sup>      | 0.80 Mg <sup>2+</sup>    |
| B site                                                            | 1.0 Mg <sup>2+</sup>      | 1.0 Mg <sup>2+</sup>     |
| C site                                                            | 0                         | 0.40 Mg <sup>2+</sup>    |
| U site                                                            | 0.35                      | NA                       |
| B-factors                                                         |                           |                          |
| Macromolecules                                                    | 30.3                      | 30.5                     |
| Me <sub>A</sub> / Lig <sub>A</sub> <sup>2</sup>                   | 25.1 / 28.1               | 25.9 / 33.3              |
| Me <sub>B</sub> / Lig <sub>B</sub> <sup>2</sup>                   | 23.8 / 24.6               | 26.9 / 25.6              |
| Me <sub>C</sub> / Lig <sub>C</sub> <sup>2</sup>                   | NA                        | 39.9 / 46.4              |
| Me <sub>U</sub> / Lig <sub>U</sub> <sup>2</sup>                   | 35.2 / 29.4               | NA                       |
| Solvent <sup>3</sup>                                              | 41.3                      | 42.3                     |
| R.m.s deviations                                                  |                           |                          |
| Bond lengths (Å)                                                  | 0.008                     | 0.008                    |
| Bond angles (°)                                                   | 1.02                      | 1.08                     |

<sup>1</sup> Data in the highest resolution shell is shown in the parenthesis.

<sup>2</sup> B-factors of metal ions and their protein, solvent, and nucleotide ligands.

<sup>3</sup> Water, ethylene glycol and glycerol

<sup>4</sup> B factors and occupancies are not listed for non-catalytic monovalent cations and halides
